# Supplementary material for: Exploring C-to-G and A-to-Y Base Editing in Rice by Using New Vector Tools
Source: MDPI journal article supplement (doi:10.3390/ijms23147990), 2022-07-20
Supplement: s1 [file s1]

# Exploring C-to-G and A-to-Y base editing in rice by using new vector tools

**Figure S1.** C-to-T, C-to-G and C-to-A substitution without indels efficiency of CGBE-rUNG-TS1~TS5 and CGBE-hUNG-TS1~TS5 during C<sub>3</sub>-C<sub>12</sub> window.

| CGBE-rUNG-TS1 |                |                |                |                |                |                |                |                 |                 |                 |  |
|---------------|----------------|----------------|----------------|----------------|----------------|----------------|----------------|-----------------|-----------------|-----------------|--|
|               | G <sub>3</sub> | C <sub>4</sub> | C <sub>5</sub> | C <sub>6</sub> | T <sub>7</sub> | C <sub>8</sub> | C <sub>9</sub> | T <sub>10</sub> | C <sub>11</sub> | C <sub>12</sub> |  |
| C-T           |                | 3.7%           | 7.4%           | 3.7%           |                | 0              | 0              |                 | 0               | 0               |  |
| C-G           |                | 0              | 3.7%           | 0              |                | 0              | 0              |                 | 0               | 0               |  |
| C-A           |                | 0              | 0              | 0              |                | 0              | 0              |                 | 0               | 0               |  |

| CGBE-rUNG-TS2 |                |                |                |                |                |                |                |                 |                 |                 |  |
|---------------|----------------|----------------|----------------|----------------|----------------|----------------|----------------|-----------------|-----------------|-----------------|--|
|               | G <sub>3</sub> | T <sub>4</sub> | C <sub>5</sub> | C <sub>6</sub> | C <sub>7</sub> | A <sub>8</sub> | C <sub>9</sub> | G <sub>10</sub> | A <sub>11</sub> | G <sub>12</sub> |  |
| C-T           |                |                | 3.7%           | 0              | 3.7%           |                | 0              |                 |                 |                 |  |
| C-G           |                |                | 0              | 0              | 0              |                | 0              |                 |                 |                 |  |
| C-A           |                |                | 0              | 0              | 0              |                | 0              |                 |                 |                 |  |

| CGBE-rUNG-TS3 |                |                |                |                |                |                |                |                 |                 |                 |  |
|---------------|----------------|----------------|----------------|----------------|----------------|----------------|----------------|-----------------|-----------------|-----------------|--|
|               | A <sub>3</sub> | C <sub>4</sub> | C <sub>5</sub> | C <sub>6</sub> | G <sub>7</sub> | C <sub>8</sub> | C <sub>9</sub> | T <sub>10</sub> | C <sub>11</sub> | G <sub>12</sub> |  |
| C-T           |                | 0              | 0              | 7.4%           |                | 0              | 0              |                 | 0               |                 |  |
| C-G           |                | 0              | 0              | 0              |                | 0              | 0              |                 | 0               |                 |  |
| C-A           |                | 0              | 0              | 0              |                | 0              | 0              |                 | 0               |                 |  |

| CGBE-rUNG-TS4 |                |                |                |                |                |                |                |                 |                 |                 |  |
|---------------|----------------|----------------|----------------|----------------|----------------|----------------|----------------|-----------------|-----------------|-----------------|--|
|               | A <sub>3</sub> | C <sub>4</sub> | C <sub>5</sub> | C <sub>6</sub> | C <sub>7</sub> | C <sub>8</sub> | G <sub>9</sub> | C <sub>10</sub> | T <sub>11</sub> | C <sub>12</sub> |  |
| C-T           |                | 7.4%           | 29.6%          | 11.1%          | 18.5%          | 3.7%           |                | 0               |                 | 0               |  |
| C-G           |                | 0              | 0              | 3.7%           | 0              | 0              |                | 0               |                 | 0               |  |
| C-A           |                | 3.7%           | 7.4%           | 0              | 3.7%           | 0              |                | 0               |                 | 0               |  |

| CGBE-rUNG-TS6 |                |                |                |                |                |                |                |                 |                 |                 |  |
|---------------|----------------|----------------|----------------|----------------|----------------|----------------|----------------|-----------------|-----------------|-----------------|--|
|               | G <sub>3</sub> | C <sub>4</sub> | A <sub>5</sub> | C <sub>6</sub> | C <sub>7</sub> | A <sub>8</sub> | T <sub>9</sub> | G <sub>10</sub> | A <sub>11</sub> | C <sub>12</sub> |  |
| C-T           |                | 18.5%          |                | 18.5%          | 18.5%          |                |                |                 |                 | 0               |  |
| C-G           |                | 3.7%           |                | 7.4%           | 11.1%          |                |                |                 |                 | 0               |  |
| C-A           |                | 0              |                | 3.7%           | 0              |                |                |                 |                 | 0               |  |

| CGBE-hUNG-TS1 |                |                |                |                |                |                |                |                 |                 |                 |  |
|---------------|----------------|----------------|----------------|----------------|----------------|----------------|----------------|-----------------|-----------------|-----------------|--|
|               | G <sub>3</sub> | C <sub>4</sub> | C <sub>5</sub> | C <sub>6</sub> | T <sub>7</sub> | C <sub>8</sub> | C <sub>9</sub> | T <sub>10</sub> | C <sub>11</sub> | C <sub>12</sub> |  |
| C-T           |                | 4.5%           | 4.5%           | 9.1%           |                | 0              | 0              |                 | 0               | 0               |  |
| C-G           |                | 0              | 0              | 4.5%           |                | 0              | 0              |                 | 0               | 0               |  |
| C-A           |                | 4.5%           | 0              | 0              |                | 0              | 0              |                 | 0               | 0               |  |

| CGBE-hUNG-TS2 |                |                |                |                |                |                |                |                 |                 |                 |  |
|---------------|----------------|----------------|----------------|----------------|----------------|----------------|----------------|-----------------|-----------------|-----------------|--|
|               | G <sub>3</sub> | T <sub>4</sub> | C <sub>5</sub> | C <sub>6</sub> | C <sub>7</sub> | A <sub>8</sub> | C <sub>9</sub> | G <sub>10</sub> | A <sub>11</sub> | G <sub>12</sub> |  |
| C-T           |                |                | 0              | 4.5%           | 13.6%          |                | 0              |                 |                 |                 |  |
| C-G           |                |                | 0              | 0              | 0              |                | 0              |                 |                 |                 |  |
| C-A           |                |                | 4.5%           | 9.1%           | 0              |                | 0              |                 |                 |                 |  |

| CGBE-hUNG-TS3 |                |                |                |                |                |                |                |                 |                 |                 |  |
|---------------|----------------|----------------|----------------|----------------|----------------|----------------|----------------|-----------------|-----------------|-----------------|--|
|               | A <sub>3</sub> | C <sub>4</sub> | C <sub>5</sub> | C <sub>6</sub> | G <sub>7</sub> | C <sub>8</sub> | C <sub>9</sub> | T <sub>10</sub> | C <sub>11</sub> | G <sub>12</sub> |  |
| C-T           |                | 4.5%           | 18.1%          | 18.1%          |                | 0              | 0              |                 | 0               |                 |  |
| C-G           |                | 0              | 0              | 4.5%           |                | 0              | 0              |                 | 0               |                 |  |
| C-A           |                | 0              | 4.5%           | 0              |                | 0              | 0              |                 | 0               |                 |  |

| CGBE-hUNG-TS4 |                |                |                |                |                |                |                |                 |                 |                 |  |
|---------------|----------------|----------------|----------------|----------------|----------------|----------------|----------------|-----------------|-----------------|-----------------|--|
|               | A <sub>3</sub> | C <sub>4</sub> | C <sub>5</sub> | C <sub>6</sub> | C <sub>7</sub> | C <sub>8</sub> | G <sub>9</sub> | C <sub>10</sub> | T <sub>11</sub> | C <sub>12</sub> |  |
| C-T           |                |                | 9.1%           | 9.1%           | 4.5%           | 9.1%           |                | 0               |                 | 0               |  |
| C-G           |                |                | 0              | 0              | 0              | 4.5%           |                | 0               |                 | 0               |  |
| C-A           |                |                | 0              | 0              | 0              | 0              |                | 0               |                 | 0               |  |

| CGBE-hUNG-TS6 |                |                |                |                |                |                |                |                 |                 |                 |  |
|---------------|----------------|----------------|----------------|----------------|----------------|----------------|----------------|-----------------|-----------------|-----------------|--|
|               | G <sub>3</sub> | C <sub>4</sub> | A <sub>5</sub> | C <sub>6</sub> | C <sub>7</sub> | A <sub>8</sub> | T <sub>9</sub> | G <sub>10</sub> | A <sub>11</sub> | C <sub>12</sub> |  |
| C-T           |                | 18.2%          |                | 13.6%          | 18.2%          |                |                |                 |                 | 0               |  |
| C-G           |                | 4.5%           |                | 4.5%           | 18.2%          |                |                |                 |                 | 0               |  |
| C-A           |                | 0              |                | 0              | 0              |                |                |                 |                 | 0               |  |

**Figure S2.** A-to-G, A-to-C and A-to-T substitution without indels efficiency of ABE8e-EndoV-TS1~TS5 and ABE8e-hAAG-TS1~TS5 during A<sub>3</sub>-A<sub>12</sub> window.

| ABE8e-Endov-TS1 |                |                |                |                |                |                |                |                 |                 |                 | ABE8e-hAAG-TS1 |                |                |                |                |                |                |                |                 |                 |                 |
|-----------------|----------------|----------------|----------------|----------------|----------------|----------------|----------------|-----------------|-----------------|-----------------|----------------|----------------|----------------|----------------|----------------|----------------|----------------|----------------|-----------------|-----------------|-----------------|
|                 | C <sub>3</sub> | T <sub>4</sub> | C <sub>5</sub> | A <sub>6</sub> | A <sub>7</sub> | C <sub>8</sub> | T <sub>9</sub> | T <sub>10</sub> | C <sub>11</sub> | A <sub>12</sub> |                | C <sub>3</sub> | T <sub>4</sub> | C <sub>5</sub> | A <sub>6</sub> | A <sub>7</sub> | C <sub>8</sub> | T <sub>9</sub> | T <sub>10</sub> | C <sub>11</sub> | A <sub>12</sub> |
| A-G             |                |                |                | 36.7%          | 0              |                |                |                 |                 | 0               | A-G            |                |                |                | 34.8%          | 0              |                |                |                 |                 | 0               |
| A-C             |                |                |                | 0              | 0              |                |                |                 |                 | 0               | A-C            |                |                |                | 0              | 0              |                |                |                 |                 | 0               |
| A-T             |                |                |                | 0              | 0              |                |                |                 |                 | 0               | A-T            |                |                |                | 0              | 0              |                |                |                 |                 | 0               |

  

| ABE8e-Endov-TS2 |                |                |                |                |                |                |                |                 |                 |                 | ABE8e-hAAG-TS2 |                |                |                |                |                |                |                |                 |                 |                 |
|-----------------|----------------|----------------|----------------|----------------|----------------|----------------|----------------|-----------------|-----------------|-----------------|----------------|----------------|----------------|----------------|----------------|----------------|----------------|----------------|-----------------|-----------------|-----------------|
|                 | G <sub>3</sub> | C <sub>4</sub> | C <sub>5</sub> | G <sub>6</sub> | A <sub>7</sub> | A <sub>8</sub> | G <sub>9</sub> | T <sub>10</sub> | C <sub>11</sub> | A <sub>12</sub> |                | G <sub>3</sub> | C <sub>4</sub> | C <sub>5</sub> | G <sub>6</sub> | A <sub>7</sub> | A <sub>8</sub> | G <sub>9</sub> | T <sub>10</sub> | C <sub>11</sub> | A <sub>12</sub> |
| A-G             |                |                |                |                | 40.0%          | 26.7%          |                |                 |                 | 0               | A-G            |                |                |                |                | 47.8%          | 26.1%          |                |                 |                 | 0               |
| A-C             |                |                |                |                | 0              | 0              |                |                 |                 | 0               | A-C            |                |                |                |                | 0              | 0              |                |                 |                 | 0               |
| A-T             |                |                |                |                | 0              | 0              |                |                 |                 | 0               | A-T            |                |                |                |                | 0              | 0              |                |                 |                 | 0               |

  

| ABE8e-Endov-TS3 |                |                |                |                |                |                |                |                 |                 |                 | ABE8e-hAAG-TS3 |                |                |                |                |                |                |                |                 |                 |                 |
|-----------------|----------------|----------------|----------------|----------------|----------------|----------------|----------------|-----------------|-----------------|-----------------|----------------|----------------|----------------|----------------|----------------|----------------|----------------|----------------|-----------------|-----------------|-----------------|
|                 | G <sub>3</sub> | A <sub>4</sub> | A <sub>5</sub> | A <sub>6</sub> | A <sub>7</sub> | A <sub>8</sub> | G <sub>9</sub> | C <sub>10</sub> | C <sub>11</sub> | G <sub>12</sub> |                | G <sub>3</sub> | A <sub>4</sub> | A <sub>5</sub> | A <sub>6</sub> | A <sub>7</sub> | A <sub>8</sub> | G <sub>9</sub> | C <sub>10</sub> | C <sub>11</sub> | G <sub>12</sub> |
| A-G             |                | 3.3%           | 26.7%          | 60.0%          | 0              | 0              |                |                 |                 |                 | A-G            |                | 8.7%           | 34.8%          | 39.1%          | 8.7%           | 0              |                |                 |                 |                 |
| A-C             |                | 0              | 0              | 0              | 0              | 0              |                |                 |                 |                 | A-C            |                | 0              | 0              | 0              | 0              | 0              |                |                 |                 |                 |
| A-T             |                | 0              | 0              | 0              | 0              | 0              |                |                 |                 |                 | A-T            |                | 0              | 0              | 0              | 0              | 0              |                |                 |                 |                 |

  

| ABE8e-Endov-TS4 |                |                |                |                |                |                |                |                 |                 |                 | ABE8e-hAAG-TS4 |                |                |                |                |                |                |                |                 |                 |                 |
|-----------------|----------------|----------------|----------------|----------------|----------------|----------------|----------------|-----------------|-----------------|-----------------|----------------|----------------|----------------|----------------|----------------|----------------|----------------|----------------|-----------------|-----------------|-----------------|
|                 | A <sub>3</sub> | A <sub>4</sub> | G <sub>5</sub> | A <sub>6</sub> | A <sub>7</sub> | G <sub>8</sub> | A <sub>9</sub> | C <sub>10</sub> | G <sub>11</sub> | A <sub>12</sub> |                | A <sub>3</sub> | A <sub>4</sub> | G <sub>5</sub> | A <sub>6</sub> | A <sub>7</sub> | G <sub>8</sub> | A <sub>9</sub> | C <sub>10</sub> | G <sub>11</sub> | A <sub>12</sub> |
| A-G             | 10.0%          | 50.0%          |                | 73.3%          | 20.0%          |                | 0              |                 |                 | 0               | A-G            | 13.0%          | 60.9%          |                | 82.6%          | 39.1%          |                | 0              |                 |                 | 0               |
| A-C             | 0              | 0              |                | 0              | 0              |                | 0              |                 |                 | 0               | A-C            | 0              | 0              |                | 0              | 0              |                | 0              |                 |                 | 0               |
| A-T             | 0              | 0              |                | 0              | 0              |                | 0              |                 |                 | 0               | A-T            | 0              | 0              |                | 0              | 0              |                | 0              |                 |                 | 0               |

  

| ABE8e-Endov-TS5 |                |                |                |                |                |                |                |                 |                 |                 | ABE8e-hAAG-TS5 |                |                |                |                |                |                |                |                 |                 |                 |
|-----------------|----------------|----------------|----------------|----------------|----------------|----------------|----------------|-----------------|-----------------|-----------------|----------------|----------------|----------------|----------------|----------------|----------------|----------------|----------------|-----------------|-----------------|-----------------|
|                 | C <sub>3</sub> | T <sub>4</sub> | A <sub>5</sub> | A <sub>6</sub> | G <sub>7</sub> | A <sub>8</sub> | C <sub>9</sub> | A <sub>10</sub> | C <sub>11</sub> | G <sub>12</sub> |                | C <sub>3</sub> | T <sub>4</sub> | A <sub>5</sub> | A <sub>6</sub> | G <sub>7</sub> | A <sub>8</sub> | C <sub>9</sub> | A <sub>10</sub> | C <sub>11</sub> | G <sub>12</sub> |
| A-G             |                |                | 63.3%          | 23.3%          |                | 6.7%           |                |                 |                 |                 | A-G            |                |                | 65.2%          | 47.8%          |                | 26.1%          |                | 0               |                 |                 |
| A-C             |                |                | 0              | 0              |                | 0              |                | 0               |                 |                 | A-C            |                |                | 0              | 0              |                | 0              |                | 0               |                 |                 |
| A-T             |                |                | 0              | 0              |                | 0              |                | 0               |                 |                 | A-T            |                |                | 0              | 0              |                | 0              |                | 0               |                 |                 |

**Figure S3.** Off-target analyses of CGBE-rUNG, CGBE-hUNG, ABE8e-EndoV and ABE8e-hAAG.

| (a)                      |                                           |           |           | (b)                |                                                   |             |            |
|--------------------------|-------------------------------------------|-----------|-----------|--------------------|---------------------------------------------------|-------------|------------|
| Target site              | Off-target sequence                       | CGBE-rUNG | CGBE-hUNG | Target site        | Off-target sequence                               | ABE8e-Endov | ABE8e-hAAG |
| <i>OsSUS6</i> -TS1       | CTGCCCTCCTCCATCGGCAA <b>AGG</b>           |           |           | <i>OsMSP1</i> -TS1 | GGCTCAACTTCAGTGGATGT <b>ggg</b>                   |             |            |
| TS1-off1                 | CTGCCCTCCTCC <b>TCG</b> CCAAAGT           | 0         | 0         | TS1-off1           | GGCTCA <b>TC</b> CT <b>TA</b> AGTGGAGGTGGA        | 0           | 0          |
| TS1-off2                 | CTGCCCGCCTCC <b>TTGG</b> CAACGG           | 0         | 0         | TS1-off2           | GGCTCA <b>TC</b> TT <b>GA</b> GTGGAGGTGGA         | 0           | 0          |
| TS1-off3                 | CGGCC <b>G</b> TCCTCCATCGGCAC <b>GGG</b>  | 0         | 0         | TS1-off3           | GGCTCA <b>TC</b> TT <b>GA</b> GTGGAGGTGGA         | 0           | 0          |
| <i>OsSUS6</i> -TS2       | CTGTCCCAAGAGCTGGTACT <b>TGT</b>           |           |           | <i>OsMSP1</i> -TS2 | AGGCCGAAGTCAGAGACCC <b>TCGG</b>                   |             |            |
| TS2-off1                 | CTGTCCCA <b>TC</b> AGCTGGT <b>TC</b> TTGT | 0         | 0         | TS2-off1           | AGGCCGAAGTC <b>CG</b> GAGACCC <b>TGGC</b>         | 3.3%        | 0          |
| TS2-off2                 | CT <b>CCA</b> CCACGAGCTGGTACT <b>TGG</b>  | 0         | 0         | TS2-off2           | AGGCCGAAGTC <b>CG</b> GACACCC <b>GCGG</b>         | 0           | 0          |
| TS2-off3                 | CTGTCC <b>CTAG</b> AGCTGG <b>ACTTGG</b>   | 0         | 0         | TS2-off3           | AGGCCGAAGTC <b>CG</b> GAGAC <b>CTTGGC</b>         | 0           | 0          |
| <i>OsSPS1</i> -TS3       | GCACCCGCCTCGAGAACATG <b>TGC</b>           |           |           | TS2-off4           | AGGCCGAAGTC <b>CG</b> GAGAC <b>CTTGGC</b>         | 0           | 0          |
| TS3-off1                 | GCACCC <b>AACTA</b> GAGAACATGAGC          | 0         | 0         | <i>Chalk5</i> -TS3 | GCGAAAAAGCCGCTACAAAC <b>CGGC</b>                  |             |            |
| TS3-off2                 | GCACCCGCCT <b>GGA</b> <b>TC</b> ACATGCGC  | 0         | 0         | TS3-off1           | G <b>GG</b> AAAAAGCCGCTAC <b>TG</b> AC <b>GGC</b> | 0           | 0          |
| TS3-off3                 | GCATCCGCCTCGA <b>AG</b> ACATGAGG          | 0         | 0         | TS3-off2           | GCGAAAAAGCC <b>CTC</b> CACAAACT <b>TGA</b>        | 0           | 0          |
| <i>OsSPS1</i> -TS4       | TGACCCCCGCTCGCCGTCGA <b>TGG</b>           |           |           | TS3-off3           | GCGAAAAAGCCG <b>TG</b> AGAAAC <b>GGT</b>          | 0           | 0          |
| TS4-off1                 | TGACCCC <b>TGGA</b> CGCCGTCGACGG          | 0         | 0         | <i>Chalk5</i> -TS4 | AGAAGAAGACGATGAGCATT <b>AGG</b>                   |             |            |
| TS4-off2                 | <b>TCCCC</b> CGCTCGCCGTCG <b>CCGG</b>     | 0         | 4.5%      | TS4-off1           | AGAAGA <b>TG</b> ACGATGAGCA <b>CTTGG</b>          | 0           | 0          |
| TS4-off3                 | <b>TGCCCCG</b> CGCTCGCCGT <b>GAAAGG</b>   | 0         | 0         | TS4-off2           | AGAAGA <b>TG</b> ACGATGAGCAT <b>AGGT</b>          | 0           | 0          |
| <i>Os07g0134700</i> -TS5 | TCGCACCATGACGCGCCGCA <b>GGT</b>           |           |           | TS4-off3           | AGAAGAAGAA <b>GAA</b> GA <b>CA</b> ATT <b>TGG</b> | 0           | 0          |
| TS5-off1                 | TCGCACCATGAC <b>TTA</b> CCGCA <b>CGG</b>  | 0         | 0         |                    |                                                   |             |            |
| TS5-off2                 | TCGCACCA <b>CGC</b> CGCGCTGCAGGG          | 0         | 0         |                    |                                                   |             |            |
| TS5-off3                 | TCGCACCATGACGCGCC <b>GAATCA</b>           | 0         | 0         |                    |                                                   |             |            |

**Table S1.** The mutation of CGBE-rUNG in T<sub>0</sub> rice.

| CGBE-rUNG-TS1 |                                              |                                      | Allelic variation         |
|---------------|----------------------------------------------|--------------------------------------|---------------------------|
| CGBE-rUNG     | Ref : GACGCCTCACCTCAGC                       | CTGCCCTCCTCCATCGGCAAAGG              | CGCGCACTTGGTCTC           |
| TS1#07        | A1 : GACGCCTCACCTCAGC                        | -TGTT- TCCTCCATCGGCAAAGG             | CGCGCACTTGGTCTC C>T, -2bp |
|               | A2 : GACGCCTCACCTCAGC                        | CTGTTTTCCTCCATCGGCAAAGG              | CGCGCACTTGGTCTC C>T       |
| TS1#06        | A1 : GACGCCTCACCTCAGC                        | CTGCCCTCCTCCATCGGCAAAGG              | CGCGCACTTGGTCTC WT        |
|               | A2 : GACGCCTCACCTCAGC                        | CTGC- T TCCTCCATCGGCAAAGG            | CGCGCACTTGGTCTC C>T, -1bp |
| TS1#03        | A1 : GACGCCTCACCTCAGC                        | CTGCCCTCCTCCATCGGCAAAGG              | CGCGCACTTGGTCTC WT        |
|               | A2 : GACGCCTCACCTCAGC                        | CTG- - CTCCTCCATCGGCAAAGG            | CGCGCACTTGGTCTC -2bp      |
| TS1#13        | A1 : GACGCCTCACCTCAGC                        | CTGCCCTCCTCCATCGGCAAAGG              | CGCGCACTTGGTCTC WT        |
|               | A2 : GACGCCTCACCTCAGC                        | TTG- - TCCTCCATCGGCAAAGG             | CGCGCACTTGGTCTC C>T, -3bp |
| TS1#26        | A1 : GACGCCTCACCTCAGC                        | CTGCCCTCCTCCATCGGCAAAGG              | CGCGCACTTGGTCTC WT        |
|               | A2 : GACGCCTCACCTCAGC                        | - - - - - CCTCCATCGGCAAAGG           | CGCGCACTTGGTCTC -7bp      |
| TS1#05        | A1 : GACGCCTCACCTCAGC                        | CTGCCCTCCTCCATCGGCAAAGG              | CGCGCACTTGGTCTC WT        |
|               | A2 : GACGCCTCACCTCAGC                        | CTGCCCTC- - - - - GGCAAAGG           | CGCGCACTTGGTCTC -7bp      |
| TS1#15        | A1 : GACGCCTCACCTCAGC                        | CTGCCCTCCTCCATCGGCAAAGG              | CGCGCACTTGGTCTC WT        |
|               | A2 : GACGCCTCACCTCAGC                        | CT- - - - - ATCGGCAAAGG              | CGCGCACTTGGTCTC -10bp     |
| TS1#11        | A1 : GACGCCTCACCTCAGC                        | CTGCC- - - - - CAAAGG                | CGCGCACTTGGTCTC -12bp     |
|               | A2 : GACGCCTCACCTCAGC                        | - - - - - CCATCGGCAAAGG              | CGCGCACTTGGTCTC -10bp     |
| TS1#17        | A1 : GACGCCTCACCTCAGC                        | CTGTGTTCCTCCATCGGCAAAGG              | CGCGCACTTGGTCTC C>T, C>G  |
|               | A2 : GACGCCTCACCT- - - - -                   | - - - - - CAAAGG                     | CGCGCACTTGGTCTC -21bp     |
| TS1#09        | A1 : GACGCCTCACC- - - - -                    | - - - - - GG                         | CGCGCACTTGGTCTC -26bp     |
|               | A2 : GACGCCTCACC- - - - -                    | - - - - - GG                         | CGCGCACTTGGTCTC -26bp     |
| TS1#21        | A1 : GACGCCTCACCTCAGC                        | CTGCCCTCCTCCATCGGCAAAGG              | CGCGCACTTGGTCTC WT        |
|               | A2 : GACGCCTCACCT- - - - -                   | - - - - - GG                         | CGCGCACTTGGTCTC -25bp     |
| TS1#12        | A1 : GATTTTGGCGCCCTGGACCTGTCGACGCCTCACCTCAGC | CTGCCCTCCTCCATCGGCAAAGG              | CGCGC WT                  |
|               | A2 : GATTTTGTG- - - - -                      | - - - - - TCGGCAAAGG                 | CGCGC -43bp               |
| TS1#02        | A1 : GACGCCTCACCTCAGC                        | CTGCCCTCCTCCATCCTCCATCGGCAAAGG       | CGCGCACTTGGTCTC +8bp      |
|               | A2 : GACGCCTCACCTCAGC                        | - - - - - CCTCCA- - - - - TCGGCAAAGG | CGCGCACTTGGTCTC -7bp      |

Bia, biallelic mutation; Het, heterozygous mutation; Hom, homozygous mutation.

| CGBE-rUNG- TS2 |                      |                         |                  |                   |
|----------------|----------------------|-------------------------|------------------|-------------------|
| CGBE-rUNG      | Ref: TTTTATCCAACGGAT | CTGTCCCACGAGCTGGTACTTGT | TTTATCAGGCTGTGCA | Allelic variation |
| TS2#28         | A1: TTTTATCCAACGGAT  | CTGTCCCACGAGCTGGTACTTGT | TTTATCAGGCTGTGCA | WT                |
|                | A2: TTTTATCCAACGGAT  | CTGTTCACGAGCTGGTACTTGT  | TTTATCAGGCTGTGCA | C>T               |
| TS2#21         | A1: TTTTATCCAACGGAT  | CTGTCCCACGAGCTGGTACTTGT | TTTATCAGGCTGTGCA | WT                |
|                | A2: TTTTATCCAACGGAT  | CTG--ACACGAGCTGGTACTTGT | TTTATCAGGCTGTGCA | C>A, -2bp         |
| TS2#18         | A1: TTTTATCCAACGGAT  | CTGTCCCACGAGCTGGTACTTGT | TTTATCAGGCTGTGCA | WT                |
|                | A2: TTTTATCCAACGGAT  | CTGT--CACGAGCTGGTACTTGT | TTTATCAGGCTGTGCA | -2bp              |
| TS2#09         | A1: TTTTATCCAACGGAT  | -----CACGAGCTGGTACTTGT  | TTTATCAGGCTGTGCA | -6bp              |
|                | A2: TTTTATCCAACGGAT  | -----CACGAGCTGGTACTTGT  | TTTATCAGGCTGTGCA | -6bp              |
| TS2#07         | A1: TTTTATCCAACGGAT  | -----AGCTGGTACTTGT      | TTTATCAGGCTGTGCA | -10bp             |

|        |                                                           |                       |     |
|--------|-----------------------------------------------------------|-----------------------|-----|
|        | A2: TTTTATCCAACGGATCTGTCCCA--AGCTGGTACTTGT                | TTATCAGGCTGTGCA -2bp  |     |
| TS2#08 | A1: TTTTATCCAACGGATCTGTCCCACGAGCTGGTACTTGT                | TTATCAGGCTGTGCA WT    | Het |
|        | A2: TTTTATCCAACGGATCTGT-----CCTACTTGT                     | TTATCAGGCTGTGCA -10bp |     |
| TS2#12 | A1: TTTTATCCAACGGATCTGTCCCACGAGCTGGTACTTGT                | TTATCAGGCTGTGCA WT    | Het |
|        | A2: TTTTATCCAACGGATCTGTC-----TACTTGT                      | TTATCAGGCTGTGCA -11bp |     |
| TS2#02 | A1: TTTTATCCAACGGATCTGT-----TACTTGT                       | TTATCAGGCTGTGCA -12bp | Het |
|        | A2: TTTTATCCAACGGATCTGTCCCACGAGCTGGTACTTGT                | TTATCAGGCTGTGCA WT    |     |
| TS2#15 | A1: TTTTATCCAACGGATCTGTCCCACGAGCTGGTACTTGT                | TTATCAGGCTGTGCA WT    | Het |
|        | A2: TTTTATCCAACGGATCTGTC-----ACTTGT                       | TTATCAGGCTGTGCA -12bp |     |
| TS2#07 | A1: TTTTATCCAACGGATCTGTCCCACGAGCTGGTACTTGT                | TTATCAGGCTGTGCA WT    | Het |
|        | A2: TTTTATCCAACGGATCTGT-----TACTTGT                       | TTATCAGGCTGTGCA -12bp |     |
| TS2#10 | A1: TTTTATCCAACGGATCTGTCCCACGAGCTGGTACTTGT                | TTATCAGGCTGTGCA WT    | Het |
|        | A2: CTTTATCCAACGGA-----ACTTGT                             | TTATCAGGCTGTGCA -18bp |     |
| TS2#23 | A1: TTTTATCCAACGGATCTGTCCCACGAGCTGGTACTTGT                | TTATCAGGCTGTGCA WT    | Het |
|        | A2: TTTTATCCAACGGATCT-----TGT                             | TTATCAGGCTGTGCA -18bp |     |
| TS2#24 | A1: TTTTATCCAACGGATCTGTCCCACGAGCTGGTACTTGT                | TTATCAGGCTGTGCA WT    | Het |
|        | A2: TTTTATCCAACGGATCT-----TGT                             | TTATCAGGCTGTGCA -18bp |     |
| TS2#10 | A1: TTTTATCCAA-----GGCTGTGCA                              | -34bp                 | Het |
|        | A2: TTTTATCCAACGGATCTGTCCCACGAGCTGGTACTTGT                | TTATCAGGCTGTGCA WT    |     |
| TS2#06 | A1: CTCGGTCAGTCTGTCTTTTATCCAACGGATCTGTCCCACGAGCTGGTACTTGT | TTATCAGGCTGT WT       | Het |
|        | A2: CTCGGT-----ACGAGCTGGTACTTGT                           | TTATCAGGCTGT -32bp    |     |

### CGBE-rUNG- TS3

| CGBE-rUNG | Ref : ACGCCCGCAGCGGA               | GCACCCGCCTCGAGAACATGTGC  | TGGCGCATCTGGCAC      | Allelic variation |
|-----------|------------------------------------|--------------------------|----------------------|-------------------|
| TS3#02    | A1: ACGCCCGCAGCGGA                 | GCACCCGCCTCGAGAACATGTGC  | TGGCGCATCTGGCAC WT   | Het               |
|           | A2: ACGCCCGCAGCGGA                 | GCACCTGCCTCGAGAACATGTGC  | TGGCGCATCTGGCAC C>T  |                   |
| TS3#06    | A1: ACGCCCGCAGCGGA                 | GCACCCGCCTCGAGAACATGTGC  | TGGCGCATCTGGCAC WT   | Het               |
|           | A2: ACGCCCGCAGCGGA                 | GCACCCGCCTCGA--CATGTGC   | TGGCGCATCTGGCAC -3bp |                   |
| TS3#27    | A1: ACGCCCGCAGCGGA                 | GCACCCGCCTCGAGAACATGTGC  | TGGCGCATCTGGCAC WT   | Het               |
|           | A2: ACGCCCGCAGCGGA                 | GCAC--GCCTCGAGAACATGTGC  | TGGCGCATCTGGCAC C>T  |                   |
| TS3#20    | A1: ACGCCCGCAGCGGA                 | GCACCTGCCTCGAGAACATGTGC  | TGGCGCATCTGGCAC C>T  | Bia               |
|           | A2: ACGCCCGCAGCGGA                 | GCAC-----CTCGAGAACATGTGC | TGGCGCATCTGGCAC -4bp |                   |
| TS3#13    | A1: ACGCCCGCAGCGGA                 | GCACCCGCCTCGAGAACATGTGC  | TGGCGCATCTGGCAC WT   | Het               |
|           | A2: ACGCCCGCGAA-----CGAGAACATGTGC  | TGGCGCATCTGGCAC -14bp    |                      |                   |
| TS3#23    | A1: ACGCCCGCAGCGGA                 | GCACCCGCCTCGAGAACATGTGC  | TGGCGCATCTGGCAC WT   | Het               |
|           | A2: AC-----GCGCATCTGGCAC           | -38bp                    |                      |                   |
| TS3#24    | A1: ACGCCCGCAGCGGA                 | GCACCCGCCTCGAGAACATGTGC  | TGGCGCATCTGGCAC WT   | Het               |
|           | A2: AC-----GCGCATCTGGCAC           | -38bp                    |                      |                   |
| TS3#09    | A1: GTCGTCGCCACCCGCAACGCCCGCAGCGGA | GCACCCGCCTCGAGAACATGTGC  | TGGCGCATCTGT WT      | Het               |
|           | A2: GTC-----GAGAACATGTGC           | TGGCGCATCTGT -39bp       |                      |                   |

### CGBE-rUNG-TS4

| CGBE-rUNG | Ref : CGCGTCGTTTCATGGA | TGACCCCCGCTCGCCGTCGATGAG | ACAGGCGCAGCGAGA | Allelic variation |
|-----------|------------------------|--------------------------|-----------------|-------------------|
|-----------|------------------------|--------------------------|-----------------|-------------------|

|        |                                                                                                                                                              |     |
|--------|--------------------------------------------------------------------------------------------------------------------------------------------------------------|-----|
| TS4#02 | A1: CGCGTCGTTTCATGGA <b>TGAATTCTGCTCGCCGTCGATGG</b> ACAGGCGCAGCGAGA C>T, C>A<br>A2: CGCGTCGTTTCATGGA <b>TGACTGCCGCTCGCCGTCGATGG</b> ACAGGCGCAGCGAGA C>T, C>G | Bia |
| TS4#18 | A1: CGCGTCGTTTCATGGA <b>TGACCCCGCTCGCCGTCGATGG</b> ACAGGCGCAGCGAGA WT<br>A2: CGCGTCGTTTCATGGA <b>TGACTCTCGCTCGCCGTCGATGG</b> ACAGGCGCAGCGAGA C>T             | Het |
| TS4#23 | A1: CGCGTCGTTTCATGGA <b>TGACATCCGCTCGCCGTCGATGG</b> ACAGGCGCAGCGAGA C>T, C>A<br>A2: CGCGTCGTTTCATGGA <b>TGATTCTCGCTCGCCGTCGATGG</b> ACAGGCGCAGCGAGA C>T      | Bia |
| TS4#24 | A1: CGCGTCGTTTCATGGA <b>TGACATCCGCTCGCCGTCGATGG</b> ACAGGCGCAGCGAGA C>T, C>A<br>A2: CGCGTCGTTTCATGGA <b>TGATTCTCGCTCGCCGTCGATGG</b> ACAGGCGCAGCGAGA C>T      | Bia |
| TS4#28 | A1: CGCGTCGTTTCATGGA <b>TGACCCCGCTCGCCGTCGATGG</b> ACAGGCGCAGCGAGA WT<br>A2: CGCGTCGTTTCATGGA <b>TGACCCACGCTCGCCGTCGATGG</b> ACAGGCGCAGCGAGA C>A             | Het |
| TS4#01 | A1: CGCGTCGTTTCATGGA <b>TGACCCCGCTCGCCGTCGATGG</b> ACAGGCGCAGCGAGA WT<br>A2: CGCGTCGTTTCATGGA <b>TGACTCCCGCTCGCCGTCGATGG</b> ACAGGCGCAGCGAGA C>T             | Het |
| TS4#26 | A1: CGCGTCGTTTCATGGA <b>TGACCCCGCTCGCCGTCGATGG</b> ACAGGCGCAGCGAGA WT<br>A2: CGCGTCGTTTCATGGA <b>TGACTCCCGCTCGCCGTCGATGG</b> ACAGGCGCAGCGAGA C>T             | Het |
| TS4#05 | A1: CGCGTCGTTTCATGGA <b>TGACCCCGCTCGCCGTCGATGG</b> ACAGGCGCAGCGAGA WT<br>A2: CGCGTCGTTTCATGGA <b>TGA---CCGCTCGCCGTCGATGG</b> ACAGGCGCAGCGAGA -3bp            | Het |
| TS4#14 | A1: CGCGTCGTTTCATGGA <b>TGACCC---CGCCGTCGATGG</b> ACAGGCGCAGCGAGA -3bp<br>A2: CGCGTCGTTTCATGGA <b>TGACCCCTCGCTCGCCGTCGATGG</b> ACAGGCGCAGCGAGA C>T           | Bia |
| TS4#06 | A1: CGCGTCGTTTCATGGA <b>TG-----CTCGCCGTCGATGG</b> ACAGGCGCAGCGAGA -7bp<br>A2: CGCGTCGTTTCATGGA <b>TGACCCCGC--GTCGTTTCATGG</b> ACAGGCGCAGCGAGA -2bp, C>T      | Bia |
| TS4#09 | A1: CGCGTCGTTTCATGGA <b>TGACCCCGCTCGCCGTCGATGG</b> ACAGGCGCAGCGAGA WT<br>A2: CGCGTCGTTTCATGGA <b>TGACC-----GCCGTCGATGG</b> ACAGGCGCAGCGAGA -7bp              | Het |
| TS4#12 | A1: CGCGTCGTTTCATGGA <b>TGACCCCGCTCGCCGTCGATGG</b> ACAGGCGCAGCGAGA WT<br>A2: CGCGTCGTTTCATGGA <b>TGA-----TCGCCGTCGATGG</b> ACAGGCGCAGCGAGA -7bp              | Het |
| TS4#17 | A1: CGCGTCGTTTCATGGA <b>TGAC-----GCTCGCCGTCGATGG</b> ACAGGCGCAGCGAGA -4bp<br>A2: CGCGTCGTTTCATGGA <b>-----GCCGTCGATGG</b> ACAGGCGCAGCGAGA -12bp              | Bia |
| TS4#16 | A1: CGCGTCGTTTCATGGA <b>TGA-----TGCGATGG</b> ACAGGCGCAGCGAGA -12bp<br>A2: CGCGTCGTTTCATGGA <b>TGA-CCCGCTCGCCGTCGATGG</b> ACAGGCGCAGCGAGA -1bp                | Bia |
| TS4#15 | A1: CGCGTCGTTTCATGGA <b>TGACCCCGCTCGCCGTCGATGG</b> ACAGGCGCAGCGAGA WT<br>A2: CGCGTCGTTTCATGGA <b>TGACCCCGCTCG-----GGCGCAGCGAGA</b> -13bp                     | Het |
| TS4#20 | A1: CGCGTCGTTTCATGGA <b>-----CGTCGATGG</b> ACAGGCGCAGCGAGA -19bp<br>A2: CGCGTCGTTTCATGG <b>-----CTCGCCGTCGATGG</b> ACAGGCGCAGCGAGA -10bp                     | Bia |
| TS4#27 | A1: CGCGTCGTTTCATGGA <b>TGACCCCGCTCGCCGTCGATGG</b> ACAGGCGCAGCGAGA WT<br>A2: C <b>-----GCGCAGCGAGA</b> -41bp                                                 | Het |
| TS4#10 | A1: AGTCCTGCGGGTCCGACGATGGCGCTCGTTTCATGGA <b>TGACCCCGCTCGCCGTCGATGG</b> ACAGG WT<br>A2: AGTC <b>-----CCGCTCGCCGTCGATGG</b> ACAGG -39bp                       | Het |
| TS4#13 | A1: CTGCGGGT <b>-----CGTCGATGG</b> ACAGGCGCA -38bp<br>A2: CTGCGGGTCCGACGATGGCGCTCGTTTCATGGA <b>TG-----CTCGCCGTCGATGG</b> ACAGGCGCA -7bp                      | Bia |
| TS4#22 | A1: GTCCGACGAT <b>-----CGAGA</b> -50bp<br>A2: GTCCGACGATGGCGCTCGTTTCATGGA <b>TGA-----TGCGATGG</b> ACAGGCGCAGCGAGA -12bp                                      | Bia |
| TS4#21 | A1: TGGATGA <b>-----AG</b> -55bp<br>A2: TGGAT <b>TGACTCTCGCTCGCCGTCGATGG</b> ACAGGCGCAGCGAGAGGTCTGGACGTCATGAGCGAG WT                                         | Het |
| TS4#07 | A1: CGCGTCGTTTCATGGA <b>TGACCCCG-----ATGG</b> ACAGGCGCAGCGAGA -10bp                                                                                          | Bia |

A2: CGCGTCGTTTCATGGATGACCCCGCTCGCCGTCTCGCCGTGATGGACAGGCGCAGCGAGA +8bp

## CGBE-rUNG-TS5

| CGBE-rUNG | Ref: GAGATCAATCAGCGGTCGCACCATGACGCGCCGCAAGGTACTGGTATTTTGGCC          | Allelic variation |
|-----------|----------------------------------------------------------------------|-------------------|
| TS5#06    | A1: GAGATCAATCAGCGGTCGTACCATGACGCGCCGCAAGGTACTGGTATTTTGGCC C>T, C>G  | Bia               |
|           | A2: GAGATCAATCAGCGGTCGCACATATGACGCGCCGCAAGGTACTGGTATTTTGGCC C>T      |                   |
| TS5#18    | A1: GAGATCAATCAGCGGTCGCACCATGACGCGCCGCAAGGTACTGGTATTTTGGCC WT        | Het               |
|           | A2: GAGATCAATCAGCGGTCGTAGCATGACGCGCCGCAAGGTACTGGTATTTTGGCC C>T, C>G  |                   |
| TS5#03    | A1: GAGATCAATCAGCGGTCGCACCATGACGCGCCGCAAGGTACTGGTATTTTGGCC WT        | Het               |
|           | A2: GAGATCAATCAGCGGTCGTATCATGACGCGCCGCAAGGTACTGGTATTTTGGCC C>T       |                   |
| TS5#04    | A1: GAGATCAATCAGCGGTCGCATCATGACGCGCCGCAAGGTACTGGTATTTTGGCC WT        | Bia               |
|           | A2: GAGATCAATCAGCGGTCGTAGTATGACGCGCCGCAAGGTACTGGTATTTTGGCC C>T, C>G  |                   |
| TS5#08    | A1: GAGATCAATCAGCGGTCGCACCATGACGCGCCGCAAGGTACTGGTATTTTGGCC WT        | Het               |
|           | A2: GAGATCAATCAGCGGTCGCATTATGACGCGCCGCAAGGTACTGGTATTTTGGCC C>T       |                   |
| TS5#11    | A1: GAGATCAATCAGCGGTCGCACCATGACGCGCCGCAAGGTACTGGTATTTTGGCC WT        | Het               |
|           | A2: GAGATCAATCAGCGGTCGCATCATGACGCGCCGCAAGGTACTGGTATTTTGGCC C>T       |                   |
| TS5#26    | A1: GAGATCAATCAGCGGTCGCACCATGACGCGCCGCAAGGTACTGGTATTTTGGCC WT        | Het               |
|           | A2: GAGATCAATCAGCGGTCGCA-CATGACGCGCCGCAAGGTACTGGTATTTTGGCC -1bp      |                   |
| TS5#07    | A1: GAGATCAATCAGCGGTCG-AATATGACGCGCCGCAAGGTACTGGTATTTTGGCC -1bp, C>T | Bia               |
|           | A2: GAGATCAATCAGCGGTCGCACGATGACGCGCTGCAGGTACTGGTATTTTGGCC C>T, C>G   |                   |
| TS5#22    | A1: GAGATCAATCAGCGGTCGCACCATGACGCGCCGCAAGGTACTGGTATTTTGGCC WT        | Het               |
|           | A2: GAGATCAATCAGCGGTCGCA--ATGACGCGCCGCAAGGTACTGGTATTTTGGCC -2bp      |                   |
| TS5#27    | A1: GAGATCAATCAGCGGTCGCACCATGACGCGCCGCAAGGTACTGGTATTTTGGCC WT        | Het               |
|           | A2: GAGATCAATCAGCGGTCGCAC--TGACGCGCCGCAAGGTACTGGTATTTTGGCC -2bp      |                   |
| TS5#21    | A1: GAGATCAATCAGCGGTCG---TATGACGCGCCGCAAGGTACTGGTATTTTGGCC C>T, -3bp | Bia               |
|           | A2: GAGATCAATCAGCGGTCGCAACATGACGCGCCGCAAGGTACTGGTATTTTGGCC C>A       |                   |
| TS5#28    | A1: GAGATCAATCAGCGGTCGTACCATGACGCGCCGCAAGGTACTGGTATTTTGGCC C>T, C>G  | Bia               |
|           | A2: GAGATCAATCAGCGGTCGC-----TGACGCGCCGCAAGGTACTGGTATTTTGGCC -4bp     |                   |
| TS5#14    | A1: GAGATCAATCAGCGGTCGCACCATGACGCGCCGCAAGGTACTGGTATTTTGGCC WT        | Het               |
|           | A2: GAGATCAATCAGCGGTCGC---ATGACGCGCCGCAAGGTACTGGTATTTTGGCC -3bp      |                   |
| TS5#09    | A1: GAGATCAATCAGCGGTCGCACCATGACGCGCCGCAAGGTACTGGTATTTTGGCC WT        | Het               |
|           | A2: GAGATCAATCAGCGGTC-----GCGCCGCAAGGTACTGGTATTTTGGCC -10bp          |                   |
| TS5#15    | A1: GAGATCAATCAGCGGTCGCACCATGACGCGCCGCAAGGTACTGGTATTTTGGCC WT        | Het               |
|           | A2: GAGATCAATCAGCGGTCGCACC-----GCAAGGTACTGGTATTTTGGCC -10bp          |                   |
| TS5#13    | A1: GAGATCAATCAGCGGT-----CGCAGGTACTGGTATTTTGGCC -15bp                | Bia               |
|           | A2: GAGATCAAT-----CATGACGCGCCGCAAGGTACTGGTATTTTGGCC -12bp            |                   |
| TS5#19    | A1: GAGATCAATCAGCGGTCGCACCATGACGCGCCGCAAGGTACTGGTATTTTGGCC WT        | Het               |
|           | A2: GAGATCAATCAGCGGTC-----CAGGTACTGGTATTTTGGCC -16bp                 |                   |
| TS5#20    | A1: GAGATCAATCAGCGGTCGCACCATGACGCGCCGCAAGGTACTGGTATTTTGGCC WT        | Het               |
|           | A2: GAG-----ACGCGCCGCAAGGTACTGGTATTTTGGCC -22bp                      |                   |
| TS5#10    | A1: GAGATCAATCAG-----GTACTGGTATTTTGGCC -24bp                         | Bia               |
|           | A2: GAGATCAATCAGCGGTCGACATATGACGCGCCGCAAGGTACTGGTATTTTGGCC C>T, C>G  |                   |
| TS5#16    | A1: GAGATCAATCAGCGGTCGCACCATGACGCGCCGCAAGGTACTGGTATTTTGGCC WT        | Het               |

|        |                                                                 |     |
|--------|-----------------------------------------------------------------|-----|
|        | A2: GAGATCAA-----TGTTATTTTGGCC -32bp                            |     |
| TS5#01 | A1: GAGATCAATCAGCGGTCTGC-----CGCAGGTACTGGTATTTTGGCC -12bp       | Bia |
|        | A2: GAGATCAATCA-----GCC -39bp                                   |     |
| TS5#02 | A1: GAGATCAATCAGCGGTCTGCACCTATGACG---CGCCGCAGGTACTGGTATTTTG C>T | Bia |
|        | A2: GAGATCAATCAGCGGTCTGCACCATGACGCGCCGCCGCAGGTACTGGTATTTTG +3bp |     |
| TS5#24 | A1: GAGATCAATCAGCGGTCTGCACCATGACG---CGCCGCAGGTACTGGTATTTTG WT   | Het |
|        | A2: GAGATCAATCAGCGGTCTGCACCATGACGCGCCGCCGCAGGTACTGGTATTTTG +3bp |     |
| TS5#23 | A1: GAGATCAATCAGCGGTCTGCACCATGA----CGCGCCGCCGCAGGTACTGGTA +3bp  | Bia |
|        | A2: GAGATCAATCAGCGGTCTGCACCATGACGCGCCG---CGCCGCAGGTACTGGTA +5bp |     |



**Table S2.** The mutation of CGBE-hUNG in T<sub>0</sub> rice.

## CGBE-hUNG-TS1

| CGBE-hUNG | Ref : ACGCCTCACCTCACGCTGCCCCCTCCTCCATCGGCAAAGGCGCGCACTTGGTCTC                 | Allelic variation |
|-----------|-------------------------------------------------------------------------------|-------------------|
| TS1#20    | A1 : ACGCCTCACCTCACGCTGCCCCCTCCTCCATCGGCAAAGGCGCGCACTTGGTCTC WT               | Het               |
|           | A2 : ACGCCTCACCTCACGCTGTCTCTCCTCCATCGGCAAAGGCGCGCACTTGGTCTC C>T               |                   |
| TS1#19    | A1 : ACGCCTCACCTCACGCTGCCCCCTCCTCCATCGGCAAAGGCGCGCACTTGGTCTC WT               | Het               |
|           | A2 : ACGCCTCACCTCACGCTGATCTCCTCCATCGGCAAAGGCGCGCACTTGGTCTC C>T, C>A           |                   |
| TS1#03    | A1 : ACGCCTCACCTCACGCTGCCCCCTCCTCCATCGGCAAAGGCGCGCACTTGGTCTC WT               | Het               |
|           | A2 : ACGCCTCACCTCACGCTGCCCCTCCTCCATCGGCAAAGGCGCGCACTTGGTCTC C>G               |                   |
| TS1#14    | A1 : ACGCCTCACCTCACGCTGCCCCCTCCTCCATCGGCAAAGGCGCGCACTTGGTCTC WT               | Het               |
|           | A2 : ACGCCTCACCTCACGCTGCC-----ATCGGCAAAGGCGCGCACTTGGTCTC -7bp                 |                   |
| TS1#01    | A1 : ACGCCTCACCTCACGCTGCCCCGA-----GGCAAAGGCGCGCACTTGGTCTC -7bp                | Bia               |
|           | A2 : ACGCCTCACCTCACGCTGCCCTCCTCCATCGGCAAAGGCGCGCACTTGGTCTC C>T                |                   |
| TS1#06    | A1 : ACGCCTCACCTCACGCTGCCCCCTCCTCCATCGGCAAAGGCGCGCACTTGGTCTC WT               | Het               |
|           | A2 : ACGCCTCACCT-----CTCCTCCATCGGCAAAGGCGCGCACTTGGTCTC -9bp                   |                   |
| TS1#15    | A1 : ACGCCTCACCTCACGCTGCCGAT-----GGCGCGCACTTGGTCTC -13bp                      | Bia               |
|           | A2 : ACGCCTCACCTCACGCTGCC-----CGCACTTGGTCTC -20bp                             |                   |
| TS1#09    | A1 : ACGCCTCACCTCACGCTGCCCCCTCCTCCATCGGCAAAGGCGCGCACTTGGTCTC WT               | Het               |
|           | A2 : ACGCCTCACCTCAC-----GCAAAGGCGCGCACTTGGTCTC -17bp                          |                   |
| TS1#17    | A1 : ACGC-----CTCCATCGGCAAAGGCGCGCACTTGGTCTC -19bp                            | Het               |
|           | A2 : ACGCCTCACCTCACGCTGCCCCCTCCTCCATCGGCAAAGGCGCGCACTTGGTCTC WT               |                   |
| TS1#21    | A1 : ACGCCTCACCTCACGCTGCCCCCTCCTCCATCGGCAAAGGCGCGCACTTGGTCTC WT               | Het               |
|           | A2 : ACGCCTCACCT-----CAAAGGCGCGCACTTGGTCTC -21bp                              |                   |
| TS1#16    | A1 : TGTACGCTCACCTCACGCTGCCCCCTCCTCCATCGGCAAAGGCGCGCACTTGGTCTC WT             | Het               |
|           | A2 : TGT-----CGGCAAAGGCGCGCACTTGGTCTC -30bp                                   |                   |
| TS1#05    | A1 : CGCCTCACCTCACGCTGCCCTCCGACCTCCATCGGCAAAGGCGCGCACTTGGTCTC +5bp            | Bia               |
|           | A2 : CGCCTCACCTCACG-----TCCATCGGCAAAGGCGCGCACTTGGTCTC -9bp                    |                   |
| TS1#08    | A1 : TTG-----TT -62bp                                                         | Bia               |
|           | A2 : TTGGCGCCCTGGACCTGTCG-----CTCCATCGGCAAAGGCGCGCACTT -22bp                  |                   |
| TS1#12    | A1 : CCTCACCTCACGCTGGCGATTAAATCGGAGTAGTTTGTGCTTCCATCGGCAAAGGCGCGCACTTGG +21bp | Bia               |
|           | A2 : CCT-----CGCGCACTTGG -32bp                                                |                   |

Bia, biallelic mutation; Het, heterozygous mutation; Hom, homozygous mutation.

## CGBE-hUNG-TS2

| CGBE-hUNG | Ref : CTTTTATCCAACGGATCTGTCCACAGAGCTGGTACTTGTTTATCAGGCTGTG           | Allelic variation |
|-----------|----------------------------------------------------------------------|-------------------|
| TS2#19    | A1 : CTTTTATCCAACGGATCTGTCCACAGAGCTGGTACTTGTTTATCAGGCTGTG WT         | Het               |
|           | A2 : CTTTTATCCAACGGATCTGTCTATACAGAGCTGGTACTTGTTTATCAGGCTGTG C>T, C>A |                   |
| TS2#17    | A1 : CTTTTATCCAACGGATCTGTCCACAGAGCTGGTACTTGTTTATCAGGCTGTG WT         | Het               |
|           | A2 : CTTTTATCCAACGGATCTGT-----ACGAGCTGGTACTTGTTTATCAGGCTGTG -3bp     |                   |
| TS2#08    | A1 : CTTTTATCCAACGGATCTGTCCACAGAGCTGGTACTTGTTTATCAGGCTGTG WT         | Het               |
|           | A2 : CTTTTATCCAACGGAT-----ACGAGCTGGTACTTGTTTATCAGGCTGTG -7bp         |                   |
| TS2#15    | A1 : CTTTTATCCAACGGATCTGTC-----ACTTGTTTATCAGGCTGTG -12bp             | Bia               |
|           | A2 : CTTTTATCCAACGGATCTGTAATACAGAGCTGGTACTTGTTTATCAGGCTGTG C>T, C>A  |                   |

|        |                                                                      |     |
|--------|----------------------------------------------------------------------|-----|
| TS2#05 | A1: CTTTATCCAACGGATCTGTCCCACGAGCTGGTACTTGTTTATCAGGCTGTG WT           | Het |
|        | A2: CTTTATCCAACGGATCT-----GTACTTGTTTATCAGGCTGTG -13bp                |     |
| TS2#01 | A1: CTTTATCCAACGGATCTGT-----TACTTGTTTATCAGGCTGTG -12bp               | Bia |
|        | A2: CTTTATCCAACGGATC-----ACTTGTTTATCAGGCTGTG -15bp                   |     |
| TS2#06 | A1: CTTTATCCAACGGATCT-----TTTGTTTATCAGGCTGTG -16bp                   | Bia |
|        | A2: CTTTATCCAACGGATCT-----GTACTTGTTTATCAGGCTGTG -13bp                |     |
| TS2#16 | A1: TATCCAACGGATCTGTCC-----TCTATC -37bp                              | Bia |
|        | A2: TATCCAACGGATCTGTCTTACGAGCTGGTACTTGTTTATCAGGCTGTGCATCTGTTTATC C>T |     |
| TS2#04 | A1: CAGTCTGTCCTTTATCCAACGGATCTGTCCCACGAGCTGGTACTTGTTTATCAGGCTGTG WT  | Het |
|        | A2: CAGTCTGTC-----TTATCAGGCTGTG -39bp                                |     |

### CGBE-hUNG-TS3

| CGBE-hUNG | Ref : ACGCCCGCGAGCGGA                          | GCACCCGCCTCGAGAACATGTGC   | TGGCGCATCTGGCAC | Allelic variation |     |
|-----------|------------------------------------------------|---------------------------|-----------------|-------------------|-----|
| TS3#12    | A1 : ACGCCCGCGAGCGGA                           | GCACCCGCCTCGAGAACATGTGC   | TGGCGCATCTGGCAC | WT                | Het |
|           | A2 : ACGCCCGCGAGCGGA                           | GCACCCGCCTCGAGAACATGTGC   | TGGCGCATCTGGCAC | C>G               |     |
| TS3#16    | A1 : ACGCCCGCGAGCGGA                           | GCACCTTGCCTCGAGAACATGTGC  | TGGCGCATCTGGCAC | C>T               | Hom |
|           | A2 : ACGCCCGCGAGCGGA                           | GCACCTTGCCTCGAGAACATGTGC  | TGGCGCATCTGGCAC | C>T               |     |
| TS3#01    | A1 : ACGCCCGCGAGCGGA                           | GCACCCGCCTCGAGAACATGTGC   | TGGCGCATCTGGCAC | WT                | Het |
|           | A2 : ACGCCCGCGAGCGGA                           | GCATTTGCCTCGAGAACATGTGC   | TGGCGCATCTGGCAC | C>T               |     |
| TS3#21    | A1 : ACGCCCGCGAGCGGA                           | GCACCCGCCTCGAGAACATGTGC   | TGGCGCATCTGGCAC | WT                | Het |
|           | A2 : ACGCCCGCGAGCGGA                           | GCACACGCCTCGAGAACATGTGC   | TGGCGCATCTGGCAC | C>A               |     |
| TS3#18    | A1 : ACGCCCGCGAGCGGA                           | GCACCCGCCTCGAGAACATGTGC   | TGGCGCATCTGGCAC | WT                | Het |
|           | A2 : ACGCCCGCGAGCGGA                           | GCACCTTGCCTCGAGAACATGTGC  | TGGCGCATCTGGCAC | C>T               |     |
| TS3#17    | A1 : ACGCCCGCGAGCGGA                           | GCACCCGCCTCGAGAACATGTGC   | TGGCGCATCTGGCAC | WT                | Het |
|           | A2 : ACGCCCGCGAGCGGA                           | GCACC-----GAGAACATGTGC    | TGGCGCATCTGGCAC | -6bp              |     |
| TS3#08    | A1 : ACGCCCGCGAGCGGA                           | GCAC-----ATGTGC           | TGGCGCATCTGGCAC | -13bp             | Bia |
|           | A2 : ACGCCCGCGA-----CCTCGAGAACATGTGC           | TGGCGCATCTGGCAC           | -12bp           |                   |     |
| TS3#5     | A1 : ACGCCCGCGAGCGGA                           | GCACCCGCCTCGAGAACATGTGC   | TGGCGCATCTGGCAC | WT                | Het |
|           | A2 : ACGCCCGCGAGCGGA                           | GCAA-----ATGTGC           | TGGCGCATCTGGCAC | -13bp             |     |
| TS3#15    | A1 : CCCGCGAGCGGA                              | GCACC-----ATGTGC          | TGGCGCATCTGGCAC | -12bp             | Bia |
|           | A2 : CCCGCGAGCGGA                              | GCACCCGCCGCTCGAGAACATGTGC | TGGCGCATCTGGCAC | +3bp              |     |
| TS3#19    | A1 : CGTCGCCACCCGCAACGCCGCGAGCGGA              | GCACCCGCCTCGAGAACATGTGC   | TGGCGCATCTGGCAC | WT                | Het |
|           | A2 : CGT-----TGCTCGAGAACATGTGC                 | TGGCGCATCTGGCAC           | -31bp           |                   |     |
| TS3#04    | A1 : CG-----TCGAGAACATGTGC                     | TGGCGCATCTGGCAC           | -49bp           | Bia               |     |
|           | A2 : CGTGGATCAAGTTCGTCGCCACCCGCAACGCCGCGAGCGGA | GCACCTTGCCTCGAGAACATGTGC  | TGGCGCATCTGGCAC |                   | C>T |

### CGBE-hUNG-TS4

| CGBE-hUNG | Ref : CGCGTCGTT | CATGGA    | TGACCCCGCTCGCCGTCGA | TGGACAGGCGCAGCGAGA       | Allelic variation       |     |
|-----------|-----------------|-----------|---------------------|--------------------------|-------------------------|-----|
| TS4#6     | A1 :            | CGCGTCGTT | CATGGA              | TGA - - - CCGCTCGCCGTCGA | TGGACAGGCGCAGCGAGA -3bp | Bia |
|           | A2 :            | CGCGTCGTT | CATGGA              | TGACCCCGCTCGCCGTCGA      | TGGACAGGCGCAGCGAGA C>G  |     |
| TS4#18    | A1 :            | CGCGTCGTT | CATGGA              | TGACCCCGCTCGCCGTCGA      | TGGACAGGCGCAGCGAGA WT   | Het |
|           | A2 :            | CGCGTCGTT | CATGGA              | TGA - CCGCTCGCCGTCGA     | TGGACAGGCGCAGCGAGA -1bp |     |

|        |                                                                                    |     |
|--------|------------------------------------------------------------------------------------|-----|
| TS4#17 | A1: CGTCGTTTCATGGA <b>TGACCCCCGCTCGCGCCGTCGATGG</b> ACAGGCGCAGCGAGA +2bp           | Bia |
|        | A2: CGTCGTTTCATGGA <b>TGACTCCCGCT--CGCCGTCGATGG</b> ACAGGCGCAGCGAGA C>T            |     |
| TS4#16 | A1: CGCGTCGTTTCATGGA <b>TGACCCCCGCTCGCCGTCGATGG</b> ACAGGCGCAGCGAGA WT             | Het |
|        | A2: CGCGTCGTTTCATGGA <b>TGA--CCCCTCGCCGTCGATGG</b> ACAGGCGCAGCGAGA -2bp            |     |
| TS4#05 | A1: GTCGTTTCATGGA <b>TGACCCCCGCTGCTCGCCGTCGATGG</b> ACAGGCGCAGCGAGA +3bp           | Bia |
|        | A2: GTCGTTTCATGGA <b>TGACCTCC--GCTCGCCGTCGATGG</b> ACAGGCGCAGCGAGA C>T             |     |
| TS4#14 | A1: TCGTTTCATGGA <b>TGACCCCCGCTCG---CCGTCGATGG</b> ACAGGCGCAGCGAGA WT              | Het |
|        | A2: TCGTTTCATGGA <b>TGACCCCCGCTCGCCGTCCGTCGATGG</b> ACAGGCGCAGCGAGA +3bp           |     |
| TS4#20 | A1: CGCGTCGTTTCATGGA <b>TGACCCCCGCTCGCCGTCGATGG</b> ACAGGCGCAGCGAGA WT             | Het |
|        | A2: CGCGTCGTTTCATGGA <b>-----ACGCTCGCCGTCGATGG</b> ACAGGCGCAGCGAGA -6bp, C>A       |     |
| TS4#21 | A1: CGCGTCGTTTCATGGA <b>-----ACGCTCGCCGTCGATGG</b> ACAGGCGCAGCGAGA -6bp, C>A       | Bia |
|        | A2: CGCGTCGTTTCATGGA <b>TGACC-----GCCGTCGATGG</b> ACAGGCGCAGCGAGA -7bp             |     |
| TS4#15 | A1: CGCGTCGTTTCATGGA <b>TG-----CTCGCCGTCGATGG</b> ACAGGCGCAGCGAGA -7bp             | Bia |
|        | A2: CGCGTCGTTTCATGGA <b>TGA-----GTCGATGG</b> ACAGGCGCAGCGAGA -12bp                 |     |
| TS4#19 | A1: CGCGTCGTTTCATGGA <b>TGAC-----GATGG</b> ACAGGCGCAGCGAGA -14bp                   | Bia |
|        | A2: CGCGTCGTTTCATGGA <b>TGAC---TGCTCGCCGTCGATGG</b> ACAGGCGCAGCGAGA -3bp, C>T      |     |
| TS4#01 | A1: CGCGTCGTTTCATGGA <b>-----GATGG</b> ACAGGCGCAGCGAGA -18bp                       | Bia |
|        | A2: CGCGTCGTTTCATGGA <b>TGA---CCGCTCGCCGTCGATGG</b> ACAGGCGCAGCGAGA -3bp           |     |
| TS4#10 | A1: CGCGTCGTTTCATGGA <b>TGACCCTTGCTCGCCGTCGATGG</b> ACAGGCGCAGCGAGA CC>TT          | Bia |
|        | A2: CGCGTCGTTTC <b>-----CGTCGATGG</b> ACAGGCGCAGCGAGA -19bp                        |     |
| TS4#09 | A1: CGCGTCG <b>-----CGTCGATGG</b> ACAGGCGCAGCGAGA -22bp                            | Bia |
|        | A2: CGCGTCGTTTCATGGA <b>TGACC-----GTCGATGG</b> ACAGGCGCAGCGAGA -10bp               |     |
| TS4#11 | A1: CGCGTCGTTTCATGG <b>-----ACAGGCGCAGCGAGA</b> -24bp                              | Bia |
|        | A2: CGCGTCGTTTCATGGA <b>TGACCCCCGCTC-----CGATGG</b> ACAGGCGCAGCGAGA -5bp           |     |
| TS4#12 | A1: CGCGTCGTTTCATGG <b>-----ACAGGCGCAGCGAGA</b> -24bp                              | Bia |
|        | A2: CGCGTCGTTTCATGGA <b>TGACCCC-----GATGG</b> ACAGGCGCAGCGAGA -11bp                |     |
| TS4#08 | A1: CGACGATGGCGCTCGTTTCATGGA <b>TGAC-----TCGATGG</b> ACAGGCGCAGCGAGA -12bp         | Bia |
|        | A2: CGACGATG <b>-----GACAGGCGCAGCGAGA</b> -38bp                                    |     |
| TS4#04 | A1: CTCTGCACCGAGTCTGCGGGTCCGACGATGGCGCTCGTTTCATGGA <b>TGACTTCTGCTCGCCGTCGA</b> C>T | Bia |
|        | A2: CTCTGC <b>-----TCGCCGTCGA</b> -51bp                                            |     |

## CGBE-hUNG-TS5

| CGBE-hUNG | Ref : GAGATCAATCAGCGG | TCGCACCATGACGCGCCGCAGGT | ACTGGTATTTTGGCC |           | Allelic variation |
|-----------|-----------------------|-------------------------|-----------------|-----------|-------------------|
| TS6#13    | A1 : GAGATCAATCAGCGG  | TCGCACCATGACGCGCCGCAGGT | ACTGGTATTTTGGCC | WT        | Het               |
|           | A2 : GAGATCAATCAGCGG  | TCGTACGATGACGCGCCGCAGGT | ACTGGTATTTTGGCC | C>T , C>G |                   |
| TS6#08    | A1 : GAGATCAATCAGCGG  | TCGCACATGACGCGCCGCAGGT  | ACTGGTATTTTGGCC | C>T       | Bia               |
|           | A2 : GAGATCAATCAGCGG  | TCGCAGCATGACGCGCCGCAGGT | ACTGGTATTTTGGCC | C>G       |                   |
| TS6#09    | A1 : GAGATCAATCAGCGG  | TCGTATGATGACGCGCCGCAGGT | ACTGGTATTTTGGCC | C>T , C>G | Bia               |
|           | A2 : GAGATCAATCAGCGG  | TCGCACGATGACGCGCCGCAGGT | ACTGGTATTTTGGCC | C>G       |                   |
| TS6#11    | A1 : GAGATCAATCAGCGG  | TCGCACCATGACGCGCCGCAGGT | ACTGGTATTTTGGCC | WT        | Het               |
|           | A2 : GAGATCAATCAGCGG  | TCGCATCATGACGCGCCGCAGGT | ACTGGTATTTTGGCC | C>T       |                   |
| TS6#19    | A1 : GAGATCAATCAGCGG  | TCGTACCATGACGCGCCGCAGGT | ACTGGTATTTTGGCC | C>T       | Het               |
|           | A2 : GAGATCAATCAGCGG  | TCGCACCATGACGCGCCGCAGGT | ACTGGTATTTTGGCC | WT        |                   |

|        |                                                                     |     |
|--------|---------------------------------------------------------------------|-----|
| TS6#16 | A1: GAGATCAATCAGCGGTCGCACCATGACGCGCCGCAGGTACTGGTATTTTGGCC +1bp      | Bia |
|        | A2: GAGATCAATCAGCGGTCGGACTATGACGCG-CCGCAGGTACTGGTATTTTGGCC C>G, C>T |     |
| TS6#06 | A1: GAGATCAATCAGCGGTGCTATCATGACGCGCCGCAGGTACTGGTATTTTGGCC C>T       | Bia |
|        | A2: GAGATCAATCAGCGGTC---TATGACGCGCCGCAGGTACTGGTATTTTGGCC -4bp       |     |
| TS6#14 | A1: GAGATCAATCAGCGGTCGCACCATGACG---CGCAGGTACTGGTATTTTGGCC -3bp      | Hom |
|        | A2: GAGATCAATCAGCGGTCGCACCATGACG---CGCAGGTACTGGTATTTTGGCC -3bp      |     |
| TS6#21 | A1: GAGATCAATCAGCGGTCGCAC-----GCGCCGCAGGTACTGGTATTTTGGCC -6bp       | Bia |
|        | A2: GAGATCAATCAGCGGTCGCACCATGA-----CGCAGGTACTGGTATTTTGGCC -5bp      |     |
| TS6#04 | A1: GAGATCAATCAGCGGTCGCACCA-----CAGGTACTGGTATTTTGGCC -10bp          | Bia |
|        | A2: GAGATCAATCAGCGGTCGCACGATGACGCGCCGCAGGTACTGGTATTTTGGCC C>G       |     |
| TS6#15 | A1: GAGATCAATCAGCGGTCGCACC-----GCAGGTACTGGTATTTTGGCC -10bp          | Bia |
|        | A2: GAGATCAATCAGCGGTCGCACGATGACGCGCCGCAGGTACTGGTATTTTGGCC C>G       |     |
| TS6#05 | A1: GAGATCAATCAGCGGT-----CGCAGGTACTGGTATTTTGGCC -15bp               | Bia |
|        | A2: GAGATCAATCAGCGGTCGCACTATGACGCGCCGCAGGTACTGGTATTTTGGCC C>T       |     |
| TS6#17 | A1: GAGATCAATCAGCGGTCGCACTATGACGCGCCGCAGGTACTGGTATTTTGGCC C>T       | Bia |
|        | A2: GAGATCAATCAGCGG-----GTACTGGTATTTTGGCC -21bp                     |     |
| TS6#10 | A1: GAGATCAATCAGCGGTCGCACCATGACGCGCCGCAGGTACTGGTATTTTGGCC WT        | Het |
|        | A2: GAGATCAAT-----GTGCAGGTACTGGTATTTTGGCC -21bp                     |     |
| TS6#01 | A1: GAG-----GTACTGGTATTTTGGCC -33bp                                 | Bia |
|        | A2: GAGATCAATCAGCGGTCG---CATGACGCGCCGCAGGTACTGGTATTTTGGCC -3bp      |     |
| TS6#12 | A1: CAATCAGCGGT-----CGCAGGTACTGGTATTTTGGCC -15bp                    | Bia |
|        | A2: CAATCAGCGGTCGCACCATGACGCGCCGCAGGTACTGGTATTTTGGCC +5bp           |     |
| TS6#20 | A1: TCAATCAGCGGTCGCACCA-----GCCGCAGGTACTGGTATTTTGGCCTTAGAACA -6bp   | Bia |
|        | A2: TCAATCAGCGGTCGCACCATGACGC-----AACA -28bp                        |     |

**Table S3.** The mutation of ABE8e-EndoV in T<sub>0</sub> rice.**ABE8e-EndoV-TS1**

| ABE8e-Endov | Ref : TCCAGTCACTTGTTCCGGCTCAACTTCAGTGGATGTGGGTTTTCGGAGAGCTT     | Allelic variation |
|-------------|-----------------------------------------------------------------|-------------------|
| TS1#7       | A1 : TCCAGTCACTTGTTCCGGCTCAACTTCAGTGGATGTGGGTTTTCGGAGAGCTT WT   | Het               |
|             | A2 : TCCAGTCACTTGTTCCGGCTCGACTTCAGTGGATGTGGGTTTTCGGAGAGCTT A>G  |                   |
| TS1#15      | A1 : TCCAGTCACTTGTTCCGGCTCAACTTCAGTGGATGTGGGTTTTCGGAGAGCTT WT   | Het               |
|             | A2 : TCCAGTCACTTGTTCCGGCTCGACTTCAGTGGATGTGGGTTTTCGGAGAGCTT A>G  |                   |
| TS1#10      | A1 : TCCAGTCACTTGTTCCGGCTCAACTTCAGTGGATGTGGGTTTTCGGAGAGCTT WT   | Het               |
|             | A2 : TCCAGTCACTTGTTCCGGCTCGACTTCAGTGGATGTGGGTTTTCGGAGAGCTT A>G  |                   |
| TS1#11      | A1 : TCCAGTCACTTGTTCCGGCTCAACTTCAGTGGATGTGGGTTTTCGGAGAGCTT WT   | Het               |
|             | A2 : TCCAGTCACTTGTTCCGGCTCGACTTCAGTGGATGTGGGTTTTCGGAGAGCTT A>G  |                   |
| TS1#16      | A1 : TCCAGTCACTTGTTCCGGCTCAACTTCAGTGGATGTGGGTTTTCGGAGAGCTT WT   | Het               |
|             | A2 : TCCAGTCACTTGTTCCGGCTCGACTTCAGTGGATGTGGGTTTTCGGAGAGCTT A>G  |                   |
| TS1#18      | A1 : TCCAGTCACTTGTTCCGGCTCAACTTCAGTGGATGTGGGTTTTCGGAGAGCTT WT   | Het               |
|             | A2 : TCCAGTCACTTGTTCCGGCTCGACTTCAGTGGATGTGGGTTTTCGGAGAGCTT A>G  |                   |
| TS1#19      | A1 : TCCAGTCACTTGTTCCGGCTCGACTTCAGTGGATGTGGGTTTTCGGAGAGCTT A>G  | Hom               |
|             | A2 : TCCAGTCACTTGTTCCGGCTCGACTTCAGTGGATGTGGGTTTTCGGAGAGCTT A>G  |                   |
| TS1#21      | A1 : TCCAGTCACTTGTTCCGGCTCAACTTCAGTGGATGTGGGTTTTCGGAGAGCTT WT   | Het               |
|             | A2 : TCCAGTCACTTGTTCCGGCTCGACTTCAGTGGATGTGGGTTTTCGGAGAGCTT A>G  |                   |
| TS1#22      | A1 : TCCAGTCACTTGTTCCGGCTCAACTTCAGTGGATGTGGGTTTTCGGAGAGCTT WT   | Het               |
|             | A2 : TCCAGTCACTTGTTCCGGCTCGACTTCAGTGGATGTGGGTTTTCGGAGAGCTT A>G  |                   |
| TS1#26      | A1 : TCCAGTCACTTGTTCCGGCTCAACTTCAGTGGATGTGGGTTTTCGGAGAGCTT WT   | Het               |
|             | A2 : TCCAGTCACTTGTTCCGGCTCAAC---AGTGGATGTGGGTTTTCGGAGAGCTT -3bp |                   |
| TS1#08      | A1 : TCCAGTCACTTGTTCCGGCTCAAC-----AGTGGGTTTTCGGAGAGCTT -9bp     | Bia               |
|             | A2 : TCCAGTCACTTGTTCCGGCTCGACTTCAGTGGATGTGGGTTTTCGGAGAGCTT A>G  |                   |
| TS1#05      | A1 : TCCAGTCACTTGTTCCGGCTCGACTTCAGTGGATGTGGGTTTTCGGAGAGCTT A>G  | Bia               |
|             | A2 : T-----TTCAGTGGATGTGGGTTTTCGGAGAGCTT -23bp                  |                   |

Bia, biallelic mutation; Het, heterozygous mutation; Hom, homozygous mutation.

**ABE8e-EndoV-TS2**

| ABE8e-Endov | Ref : CTGATGATCCTTGCAAGGCCGAGTCAGAGACCCTCGGCTCGAAGTTCTCATC    | Allelic variation |
|-------------|---------------------------------------------------------------|-------------------|
| TS2#02      | A1 : CTGATGATCCTTGCAAGGCCGAGTCAGAGACCCTCGGCTCGAAGTTCTCATC A>G | Bia               |
|             | A2 : CTGATGATCCTTGCAAGGCCGAGTCAGAGACCCTCGGCTCGAAGTTCTCATC A>G |                   |
| TS2#05      | A1 : CTGATGATCCTTGCAAGGCCGAGTCAGAGACCCTCGGCTCGAAGTTCTCATC A>G | Bia               |
|             | A2 : CTGATGATCCTTGCAAGGCCGAGTCAGAGACCCTCGGCTCGAAGTTCTCATC A>G |                   |
| TS2#06      | A1 : CTGATGATCCTTGCAAGGCCGAGTCAGAGACCCTCGGCTCGAAGTTCTCATC A>G | Bia               |
|             | A2 : CTGATGATCCTTGCAAGGCCGAGTCAGAGACCCTCGGCTCGAAGTTCTCATC A>G |                   |
| TS2#09      | A1 : CTGATGATCCTTGCAAGGCCGAGTCAGAGACCCTCGGCTCGAAGTTCTCATC A>G | Bia               |
|             | A2 : CTGATGATCCTTGCAAGGCCGAGTCAGAGACCCTCGGCTCGAAGTTCTCATC A>G |                   |
| TS2#10      | A1 : CTGATGATCCTTGCAAGGCCGAGTCAGAGACCCTCGGCTCGAAGTTCTCATC WT  | Het               |
|             | A2 : CTGATGATCCTTGCAAGGCCGAGTCAGAGACCCTCGGCTCGAAGTTCTCATC A>G |                   |
| TS2#12      | A1 : CTGATGATCCTTGCAAGGCCGAGTCAGAGACCCTCGGCTCGAAGTTCTCATC WT  | Het               |
|             | A2 : CTGATGATCCTTGCAAGGCCGAGTCAGAGACCCTCGGCTCGAAGTTCTCATC A>G |                   |

|        |                                                                      |     |
|--------|----------------------------------------------------------------------|-----|
| TS2#13 | A1: CTGATGATCCTTGCAAGGCCGAAGTCAGAGACCCTCGGCTCGAAGTTCTCATC WT         | Het |
|        | A2: CTGATGATCCTTGCAAGGCCGGAGTCAGAGACCCTCGGCTCGAAGTTCTCATC A>G        |     |
| TS2#14 | A1: CTGATGATCCTTGCAAGGCCGAAGTCAGAGACCCTCGGCTCGAAGTTCTCATC WT         | Het |
|        | A2: CTGATGATCCTTGCAAGGCCGGAGTCAGAGACCCTCGGCTCGAAGTTCTCATC A>G        |     |
| TS2#20 | A1: CTGATGATCCTTGCAAGGCCGAAGTCAGAGACCCTCGGCTCGAAGTTCTCATC WT         | Het |
|        | A2: CTGATGATCCTTGCAAGGCCGGAGTCAGAGACCCTCGGCTCGAAGTTCTCATC A>G        |     |
| TS2#24 | A1: CTGATGATCCTTGCAAGGCCGGAGTCAGAGACCCTCGGCTCGAAGTTCTCATC A>G        | Bia |
|        | A2: CTGATGATCCTTGCAAGGCCGGGGTCAGAGACCCTCGGCTCGAAGTTCTCATC A>G        |     |
| TS2#25 | A1: CTGATGATCCTTGCAAGGCCGAAGTCAGAGACCCTCGGCTCGAAGTTCTCATC WT         | Het |
|        | A2: CTGATGATCCTTGCAAGGCCGGGGTCAGAGACCCTCGGCTCGAAGTTCTCATC A>G        |     |
| TS2#28 | A1: CTGATGATCCTTGCAAGGCCGGAGTCAGAGACCCTCGGCTCGAAGTTCTCATC A>G        | Bia |
|        | A2: CTGATGATCCTTGCAAGGCCGAGTCAGAGACCCTCGGCTCGAAGTTCTCATC A>G         |     |
| TS2#17 | A1: CTGATGATCCTTGCAAGGCCGG-GTCAGAGACCCTCGGCTCGAAGTTCTCATC -1bp, A>G  | Het |
|        | A2: CTGATGATCCTTGCAAGGCCGAAGTCAGAGACCCTCGGCTCGAAGTTCTCATC WT         |     |
| TS2#23 | A1: CTGATGATCCTTGCAAGGCCGG-GTCAGAGACCCTCGGCTCGAAGTTCTCATC -1bp, A>G  | Bia |
|        | A2: CTGATGATCCTTGCAAGGCCGAGGTCAGAGACCCTCGGCTCGAAGTTCTCATC A>G        |     |
| TS2#29 | A1: CTGATGATCCTTGCAAGGCCGAAGTCAGAGACCCTCGGCTCGAAGTTCTCATC WT         | Het |
|        | A2: CTGATGATCCTTGCAAGGCCGG-GTCAGAGACCCTCGGCTCGAAGTTCTCATC -1bp, A>G  |     |
| TS2#30 | A1: CTGATGATCCTTGCAAGGCCGAAGTCAGAGACCCTCGGCTCGAAGTTCTCATC WT         | Het |
|        | A2: CTGATGATCCTTGCAAGGCCGG-GTCAGAGACCCTCGGCTCGAAGTTCTCATC -1bp, A>G  |     |
| TS2#08 | A1: CTGATGATCCTTGCAAGGCTGAGGGTCAGAGACCCTCGGCTCGAAGTTCTCAT +1bp, A>G  | Bia |
|        | A2: CTGATGATCCTTGCAAGGC-CGAGGTCAGAGACCCTCGGCTCGAAGTTCTCAT A>G        |     |
| TS2#16 | A1: ATGATCCTTGCAAGGCCGAG-----GTCAGAGACCCTCGGCTCGAAGTTCTCATC A>G      | Bia |
|        | A2: ATGATCCTTGCAAGGCCGAAGTCTCTTGTGTCAGAGACCCTCGGCTCGAAGTTCTCATC +7bp |     |

### ABE8e-EndoV-TS3

| ABE8e-Endov | Ref: TCACCAAGAAAAGTAGCGAAAAAGCCGCTACAAACGGCACCGTCTAGAATCCT     | Allelic variation |
|-------------|----------------------------------------------------------------|-------------------|
| TS3#01      | A1: TCACCAAGAAAAGTAGCGAGGGAAGCCGCTACAAACGGCACCGTCTAGAATCCT A>G | Hom               |
|             | A2: TCACCAAGAAAAGTAGCGAGGGAAGCCGCTACAAACGGCACCGTCTAGAATCCT A>G |                   |
| TS3#04      | A1: TCACCAAGAAAAGTAGCGAAAAAGCCGCTACAAACGGCACCGTCTAGAATCCT WT   | Het               |
|             | A2: TCACCAAGAAAAGTAGCGAAGGAAGCCGCTACAAACGGCACCGTCTAGAATCCT A>G |                   |
| TS3#07      | A1: TCACCAAGAAAAGTAGCGAAAAAGCCGCTACAAACGGCACCGTCTAGAATCCT WT   | Het               |
|             | A2: TCACCAAGAAAAGTAGCGAAGGAAGCCGCTACAAACGGCACCGTCTAGAATCCT A>G |                   |
| TS3#08      | A1: TCACCAAGAAAAGTAGCGAGGGAAGCCGCTACAAACGGCACCGTCTAGAATCCT A>G | Bia               |
|             | A2: TCACCAAGAAAAGTAGCGAAGGAAGCCGCTACAAACGGCACCGTCTAGAATCCT A>G |                   |
| TS3#10      | A1: TCACCAAGAAAAGTAGCGAAAAAGCCGCTACAAACGGCACCGTCTAGAATCCT WT   | Het               |
|             | A2: TCACCAAGAAAAGTAGCGAAGGAAGCCGCTACAAACGGCACCGTCTAGAATCCT A>G |                   |
| TS3#12      | A1: TCACCAAGAAAAGTAGCGAAAAAGCCGCTACAAACGGCACCGTCTAGAATCCT WT   | Het               |
|             | A2: TCACCAAGAAAAGTAGCGAGGGAAGCCGCTACAAACGGCACCGTCTAGAATCCT A>G |                   |
| TS3#15      | A1: TCACCAAGAAAAGTAGCGAAAAAGCCGCTACAAACGGCACCGTCTAGAATCCT WT   | Het               |
|             | A2: TCACCAAGAAAAGTAGCGGAGGAAGCCGCTACAAACGGCACCGTCTAGAATCCT A>G |                   |
| TS3#16      | A1: TCACCAAGAAAAGTAGCGAAAAAGCCGCTACAAACGGCACCGTCTAGAATCCT WT   | Het               |
|             | A2: TCACCAAGAAAAGTAGCGAAGGAAGCCGCTACAAACGGCACCGTCTAGAATCCT A>G |                   |

|        |                                                                      |     |
|--------|----------------------------------------------------------------------|-----|
| TS3#13 | A1: TCACCAAGAAAAGTA GCGAAAAAGCCGCTACAAACGGC ACCGTCTAGAATCCT WT       | Het |
|        | A2: TCACCAAGAAAAGTA GCGAAG AAGCCGCTACAAACGGC ACCGTCTAGAATCCT A>G     |     |
| TS3#17 | A1: TCACCAAGAAAAGTA GCGAAAAAGCCGCTACAAACGGC ACCGTCTAGAATCCT WT       | Het |
|        | A2: TCACCAAGAAAAGTA GCGAGG AAGCCGCTACAAACGGC ACCGTCTAGAATCCT A>G     |     |
| TS3#11 | A1: TCACCAAGAAAAGTA GCGAGG AAGCCGCTACAAACGGC ACCGTCTAGAATCCT A>G     | Het |
|        | A2: TCACCAAGAAAAGTA GCGAAAAAGCCGCTACAAACGGC ACCGTCTAGAATCCT WT       |     |
| TS3#24 | A1: TCACCAAGAAAAGTA GCGAAAAAGCCGCTACAAACGGC ACCGTCTAGAATCCT WT       | Het |
|        | A2: TCACCAAGAAAAGTA GCGAAG AAGCCGCTACAAACGGC ACCGTCTAGAATCCT A>G     |     |
| TS3#28 | A1: TCACCAAGAAAAGTA GCGAAAAAGCCGCTACAAACGGC ACCGTCTAGAATCCT WT       | Het |
|        | A2: TCACCAAGAAAAGTA GCGAAG AAGCCGCTACAAACGGC ACCGTCTAGAATCCT A>G     |     |
| TS3#29 | A1: TCACCAAGAAAAGTA GCGAAAAAGCCGCTACAAACGGC ACCGTCTAGAATCCT WT       | Het |
|        | A2: TCACCAAGAAAAGTA GCGAGG AAGCCGCTACAAACGGC ACCGTCTAGAATCCT A>G     |     |
| TS3#30 | A1: TCACCAAGAAAAGTA GCGAAAAAGCCGCTACAAACGGC ACCGTCTAGAATCCT WT       | Het |
|        | A2: TCACCAAGAAAAGTA GCGAGG AAGCCGCTACAAACGGC ACCGTCTAGAATCCT A>G     |     |
| TS3#05 | A1: TCACCAAGAAAAGTA GCGAAAAAGCCGCTACAAACGGC ACCGTCTAGAATCCT WT       | Het |
|        | A2: TCACCAAGAAAAGTA GCGA - GG AAGCCGCTACAAACGGC ACCGTCTAGAATCCT -1bp |     |
| TS3#03 | A1: TCACCAAGAAAAGTA GCGAGG - - - - - TTTGGACGC ACCGTCTAGAATCCT -8bp  | Bia |
|        | A2: TCACCAAGAAAAGTA GCGAAG AAGCCGCTACAAACGGC ACCGTCTAGAATCCT A>G     |     |
| TS3#23 | A1: TCACCAAGAAAAGTA GCGAGG AAGCCGCTACAAACGGC ACCGTCTAGAATCCT A>G     | Bia |
|        | A2: TCACCAAGAAAAGTA GCGA - - - - - - GGAACGGC ACCGTCTAGAATCCT -11bp  |     |

#### ABE8e-EndoV-TS4

| ABE8e-Endov | Ref: ACGCATGGATAAACA AGAAGAAGACGATGAGCATTAGG GTTCCTTAACCAAGTT     | Allelic variation |
|-------------|-------------------------------------------------------------------|-------------------|
| TS4#01      | A1: ACGCATGGATAAACA AGAAGGAGACGATGAGCATTAGG GTTCCTTAACCAAGTT A>G  | Bia               |
|             | A2: ACGCATGGATAAACA AGAGGGAGACGATGAGCATTAGG GTTCCTTAACCAAGTT A>G  |                   |
| TS4#03      | A1: ACGCATGGATAAACA AGAAGGAGACGATGAGCATTAGG GTTCCTTAACCAAGTT A>G  | Bia               |
|             | A2: ACGCATGGATAAACA AGAGGGGAGACGATGAGCATTAGG GTTCCTTAACCAAGTT A>G |                   |
| TS4#05      | A1: ACGCATGGATAAACA AGAAGGAGACGATGAGCATTAGG GTTCCTTAACCAAGTT A>G  | Hom               |
|             | A2: ACGCATGGATAAACA AGAAGGAGACGATGAGCATTAGG GTTCCTTAACCAAGTT A>G  |                   |
| TS4#06      | A1: ACGCATGGATAAACA AGAAGGAGACGATGAGCATTAGG GTTCCTTAACCAAGTT A>G  | Bia               |
|             | A2: ACGCATGGATAAACA AGAGGGAGACGATGAGCATTAGG GTTCCTTAACCAAGTT A>G  |                   |
| TS4#08      | A1: ACGCATGGATAAACA AGAGGGAGACGATGAGCATTAGG GTTCCTTAACCAAGTT A>G  | Bia               |
|             | A2: ACGCATGGATAAACA AGGAGAAGACGATGAGCATTAGG GTTCCTTAACCAAGTT A>G  |                   |
| TS4#10      | A1: ACGCATGGATAAACA AGAGGAAGACGATGAGCATTAGG GTTCCTTAACCAAGTT A>G  | Bia               |
|             | A2: ACGCATGGATAAACA AGAAGGAGACGATGAGCATTAGG GTTCCTTAACCAAGTT A>G  |                   |
| TS4#13      | A1: ACGCATGGATAAACA AGAAGGAGACGATGAGCATTAGG GTTCCTTAACCAAGTT A>G  | Bia               |
|             | A2: ACGCATGGATAAACA AGGAGGAGACGATGAGCATTAGG GTTCCTTAACCAAGTT A>G  |                   |
| TS4#14      | A1: ACGCATGGATAAACA AGAAGGAGACGATGAGCATTAGG GTTCCTTAACCAAGTT A>G  | Bia               |
|             | A2: ACGCATGGATAAACA AGAGGGAGACGATGAGCATTAGG GTTCCTTAACCAAGTT A>G  |                   |
| TS4#15      | A1: ACGCATGGATAAACA AGAAGAAGACGATGAGCATTAGG GTTCCTTAACCAAGTT WT   | Het               |
|             | A2: ACGCATGGATAAACA AGAGGAAGACGATGAGCATTAGG GTTCCTTAACCAAGTT A>G  |                   |
| TS4#17      | A1: ACGCATGGATAAACA AGAGGAAGACGATGAGCATTAGG GTTCCTTAACCAAGTT A>G  | Bia               |
|             | A2: ACGCATGGATAAACA AGAGGGAGACGATGAGCATTAGG GTTCCTTAACCAAGTT A>G  |                   |

|        |                                                                       |     |
|--------|-----------------------------------------------------------------------|-----|
| TS4#18 | A1: ACGCATGGATAAAACAAGAAGAAGACGATGAGCATTAGGGTTTCCTTAACCAGTT WT        | Het |
|        | A2: ACGCATGGATAAAACAAGAGGAAGACGATGAGCATTAGGGTTTCCTTAACCAGTT A>G       |     |
| TS4#11 | A1: ACGCATGGATAAAACAAGGGGAGACGATGAGCATTAGGGTTTCCTTAACCAGTT A>G        | Bia |
|        | A2: ACGCATGGATAAAACAAGAAGAGGACGATGAGCATTAGGGTTTCCTTAACCAGTT A>G       |     |
| TS4#20 | A1: ACGCATGGATAAAACAAGAAGGAGACGATGAGCATTAGGGTTTCCTTAACCAGTT A>G       | Bia |
|        | A2: ACGCATGGATAAAACAAGAGGGGAGACGATGAGCATTAGGGTTTCCTTAACCAGTT A>G      |     |
| TS4#23 | A1: ACGCATGGATAAAACAAGAGGGAGACGATGAGCATTAGGGTTTCCTTAACCAGTT A>G       | Bia |
|        | A2: ACGCATGGATAAAACAAGAGGGGGACGATGAGCATTAGGGTTTCCTTAACCAGTT A>G       |     |
| TS4#24 | A1: ACGCATGGATAAAACAAGAAGGAGACGATGAGCATTAGGGTTTCCTTAACCAGTT A>G       | Bia |
|        | A2: ACGCATGGATAAAACAAGAGGGGAGACGATGAGCATTAGGGTTTCCTTAACCAGTT A>G      |     |
| TS4#25 | A1: ACGCATGGATAAAACAAGAAGAAGACGATGAGCATTAGGGTTTCCTTAACCAGTT WT        | Het |
|        | A2: ACGCATGGATAAAACAAGAAGGAGACGATGAGCATTAGGGTTTCCTTAACCAGTT A>G       |     |
| TS4#27 | A1: ACGCATGGATAAAACAAGAAGAA--CGATGAGCATTAGGGTTTCCTTAACCAGTT -2bp      | Bia |
|        | A2: ACGCATGGATAAAACAAGAAGGAGACGATGAGCATTAGGGTTTCCTTAACCAGTT A>G       |     |
| TS4#29 | A1: ACGCATGGATAAAACAAGAAGGAGACGATGAGCATTAGGGTTTCCTTAACCAGTT A>G       | Bia |
|        | A2: ACGCATGGATAAAACAAGAGG---ACGATGAGCATTAGGGTTTCCTTAACCAGTT A>G, -3bp |     |
| TS4#28 | A1: ACGCATGGATAAAACAAGAGGGGACGATGAGCATTAGGGTTTCCTTAACCAGTT A>G        | Bia |
|        | A2: ACGCATGGATAAAACAAGAAA---ACGATGAGCATTAGGGTTTCCTTAACCAGTT A>G, -3bp |     |
| TS4#04 | A1: ACGCATGGATAAAACAAGAAGA-----ATTAGGGTTTCCTTAACCAGTT -11bp           | Bia |
|        | A2: ACGCATGGATAAAACAAGAGGGAGACGATGAGCATTAGGGTTTCCTTAACCAGTT A>G       |     |
| TS4#07 | A1: ACGCATGGATAAAACAAGAAGA-----ATTAGGGTTTCCTTAACCAGTT -11bp           | Bia |
|        | A2: ACGCATGGATAAAACAAGAAGGGGACGATGAGCATTAGGGTTTCCTTAACCAGTT A>G       |     |
| TS4#09 | A1: ACGCATGGATAAAACAAGAAGA-----ATTAGGGTTTCCTTAACCAGTT -11bp           | Bia |
|        | A2: ACGCATGGATAAAACAAGAAGAAGACGATGAGCATTAGGGTTTCCTTAACCAGTT A>G       |     |
| TS4#12 | A1: ACGCATGGATAAAACAAGAAGG-----ATTAGGGTTTCCTTAACCAGTT A>G, -11bp      | Bia |
|        | A2: ACGCATGGATAAAACAAGAAGGAGACGATGAGCATTAGGGTTTCCTTAACCAGTT A>G       |     |
| TS4#16 | A1: ACGCATGGATAAAACAAGAAGA-----ATTAGGGTTTCCTTAACCAGTT -11bp           | Bia |
|        | A2: ACGCATGGATAAAACAAGAAGGGGACGATGAGCATTAGGGTTTCCTTAACCAGTT A>G       |     |
| TS4#02 | A1: ACGCATGGATAAAACAAGAAGG-----ATTAGGGTTTCCTTAACCAGTT -11bp           | Bia |
|        | A2: ACGCATGGATAAAACAAGGG---GACGATGAGCATTAGGGTTTCCTTAACCAGTT A>G, -3bp |     |

#### ABE8e-EndoV-TS5

| ABE8e-Endov | Ref: TAGATCCATCACATCTACTAAGACACGCGCCGCCATGATCGAGGTAATTAAGG     | Allelic variation |
|-------------|----------------------------------------------------------------|-------------------|
| TS5#01      | A1: TAGATCCATCACATCTACTAAGGACACGCGCCGCCATGATCGAGGTAATTAAGG A>G | Bia               |
|             | A2: TAGATCCATCACATCTACTGAGACACGCGCCGCCATGATCGAGGTAATTAAGG A>G  |                   |
| TS5#04      | A1: TAGATCCATCACATCTACTAAGACACGCGCCGCCATGATCGAGGTAATTAAGG WT   | Het               |
|             | A2: TAGATCCATCACATCTACTGAGACACGCGCCGCCATGATCGAGGTAATTAAGG A>G  |                   |
| TS5#06      | A1: TAGATCCATCACATCTGCTAAGACACGCGCCGCCATGATCGAGGTAATTAAGG A>G  | Bia               |
|             | A2: TAGATCCATCACATCTACTGAGACACGCGCCGCCATGATCGAGGTAATTAAGG A>G  |                   |
| TS5#07      | A1: TAGATCCATCACATCTACTAAGACACGCGCCGCCATGATCGAGGTAATTAAGG WT   | Het               |
|             | A2: TAGATCCATCACATCTACTGAGACACGCGCCGCCATGATCGAGGTAATTAAGG A>G  |                   |
| TS5#08      | A1: TAGATCCATCACATCTACTGGGACACGCGCCGCCATGATCGAGGTAATTAAGG A>G  | Hom               |



|        |                     |                         |                       |     |
|--------|---------------------|-------------------------|-----------------------|-----|
|        | A2: TAGATCCATCACATC | TACTGGGACACGCGCCGCCATGA | TCGAGGTAATTAAGG A>G   |     |
| TS5#12 | A1: TAGATCCATCACATC | TACTGAGACACGCGCCGCCATGA | TCGAGGTAATTAAGG A>G   | Bia |
|        | A2: TAGATCCATCACATC | TACTGGGACACGCGCCGCCATGA | TCGAGGTAATTAAGG A>G   |     |
| TS5#15 | A1: TAGATCCATCACATC | TACTAAGACACGCGCCGCCATGA | TCGAGGTAATTAAGG WT    | Het |
|        | A2: TAGATCCATCACATC | TACTGGGACACGCGCCGCCATGA | TCGAGGTAATTAAGG A>G   |     |
| TS5#16 | A1: TAGATCCATCACATC | TACTAAGACACGCGCCGCCATGA | TCGAGGTAATTAAGG WT    | Het |
|        | A2: TAGATCCATCACATC | TACTGAGACACGCGCCGCCATGA | TCGAGGTAATTAAGG A>G   |     |
| TS5#05 | A1: TAGATCCATCACATC | TACTGAGACACGCGCCGCCATGA | TCGAGGTAATTAAGG       | Bia |
|        | A2: TAGATCCATCACATC | TACTGGGACACGCGCCGCCATGA | TCGAGGTAATTAAGG A>G   |     |
| TS5#17 | A1: TAGATCCATCACATC | TACTAAGACACGCGCCGCCATGA | TCGAGGTAATTAAGG WT    | Het |
|        | A2: TAGATCCATCACATC | TACTGAGACACGCGCCGCCATGA | TCGAGGTAATTAAGG A>G   |     |
| TS5#18 | A1: TAGATCCATCACATC | TACTAAGACACGCGCCGCCATGA | TCGAGGTAATTAAGG WT    | Het |
|        | A2: TAGATCCATCACATC | TACTGAGACACGCGCCGCCATGA | TCGAGGTAATTAAGG A>G   |     |
| TS5#11 | A1: TAGATCCATCACATC | TACTAAGACACGCGCCGCCATGA | TCGAGGTAATTAAGG WT    | Het |
|        | A2: TAGATCCATCACATC | TACTGAGACACGCGCCGCCATGA | TCGAGGTAATTAAGG A>G   |     |
| TS5#20 | A1: TAGATCCATCACATC | TACTAAGACACGCGCCGCCATGA | TCGAGGTAATTAAGG WT    | Het |
|        | A2: TAGATCCATCACATC | TACTGAGACACGCGCCGCCATGA | TCGAGGTAATTAAGG A>G   |     |
| TS5#24 | A1: TAGATCCATCACATC | TACTAAGACACGCGCCGCCATGA | TCGAGGTAATTAAGG WT    | Het |
|        | A2: TAGATCCATCACATC | TACTGAGACACGCGCCGCCATGA | TCGAGGTAATTAAGG A>G   |     |
| TS5#29 | A1: TAGATCCATCACATC | TACTGAGACACGCGCCGCCATGA | TCGAGGTAATTAAGG A>G   | Bia |
|        | A2: TAGATCCATCACATC | TACTGAGGCACGCGCCGCCATGA | TCGAGGTAATTAAGG A>G   |     |
| TS5#23 | A1: TAGATCCATCACATC | TACTGAGACACGCGCCGCCATGA | TCGAGGTAATTAAGG A>G   | Bia |
|        | A2: TAGATCCATCACATC | TACTGGGACACGCGCCGCCATGA | TCGAGGTAATTAAGG A>G   |     |
| TS5#10 | A1: TAGATCCATCACATC | TACTGAGACACGCGCCGCCATGA | TCGAGGTAATTAAGG A>G   | Bia |
|        | A2: TAGATCCATCACATC | TACT----CACGCGCCGCCATGA | TCGAGGTAATTAAGG -4bp  |     |
| TS5#19 | A1: TAGATCCATCACATC | TACT-----CGCGCCGCCATGA  | TCGAGGTAATTAAGG -6bp  | Bia |
|        | A2: TAGATCCATCACATC | TACTGGGACACGCGCCGCCATGA | TCGAGGTAATTAAGG A>G   |     |
| TS5#13 | A1: TAGATCCATCACATC | TACTGGGACACGCGCCGCCATGA | TCGAGGTAATTAAGG A>G   | Bia |
|        | A2: TAGATCCATCACATC | TACT-----CCATGA         | TCGAGGTAATTAAGG -13bp |     |
| TS5#09 | A1: TAGATCCATCACATC | TACTAAGACACGCGCCGCCATGA | TCGAGGTAATTAAGG WT    | Het |
|        | A2: TAGATCCATCACATC | TA-----CCATGA           | TCGAGGTAATTAAGG -15bp |     |
| TS5#30 | A1: TAGATCCATCACATC | TACT-----GAGGTAATTAAGG  | -21bp                 | Bia |
|        | A2: TAGATCCATCACATC | TACTGAGACACGCGCCGCCATGA | TCGAGGTAATTAAGG A>G   |     |

**Table S4.** The mutation of ABE8e-hAAG in T<sub>0</sub> rice.**ABE8e-hAAG-TS1**

| ABE8e-hAAG | Ref : TCCAGTCACTTGTTCCGGCTCAACTTCAGTGGATGTGGGTTTTCGGAGAGCTT    | Allelic variation |
|------------|----------------------------------------------------------------|-------------------|
| TS1#01     | A1 : TCCAGTCACTTGTTCCGGCTCAACTTCAGTGGATGTGGGTTTTCGGAGAGCTT WT  | Het               |
|            | A2 : TCCAGTCACTTGTTCCGGCTCGACTTCAGTGGATGTGGGTTTTCGGAGAGCTT A>G |                   |
| TS1#10     | A1 : TCCAGTCACTTGTTCCGGCTCAACTTCAGTGGATGTGGGTTTTCGGAGAGCTT WT  | Het               |
|            | A2 : TCCAGTCACTTGTTCCGGCTCGACTTCAGTGGATGTGGGTTTTCGGAGAGCTT A>G |                   |
| TS1#13     | A1 : TCCAGTCACTTGTTCCGGCTCAACTTCAGTGGATGTGGGTTTTCGGAGAGCTT WT  | Het               |
|            | A2 : TCCAGTCACTTGTTCCGGCTCGACTTCAGTGGATGTGGGTTTTCGGAGAGCTT A>G |                   |
| TS1#14     | A1 : TCCAGTCACTTGTTCCGGCTCAACTTCAGTGGATGTGGGTTTTCGGAGAGCTT WT  | Het               |
|            | A2 : TCCAGTCACTTGTTCCGGCTCGACTTCAGTGGATGTGGGTTTTCGGAGAGCTT A>G |                   |
| TS1#18     | A1 : TCCAGTCACTTGTTCCGGCTCAACTTCAGTGGATGTGGGTTTTCGGAGAGCTT WT  | Het               |
|            | A2 : TCCAGTCACTTGTTCCGGCTCGACTTCAGTGGATGTGGGTTTTCGGAGAGCTT A>G |                   |
| TS1#19     | A1 : TCCAGTCACTTGTTCCGGCTCAACTTCAGTGGATGTGGGTTTTCGGAGAGCTT WT  | Het               |
|            | A2 : TCCAGTCACTTGTTCCGGCTCGACTTCAGTGGATGTGGGTTTTCGGAGAGCTT A>G |                   |
| TS1#21     | A1 : TCCAGTCACTTGTTCCGGCTCAACTTCAGTGGATGTGGGTTTTCGGAGAGCTT WT  | Het               |
|            | A2 : TCCAGTCACTTGTTCCGGCTCGACTTCAGTGGATGTGGGTTTTCGGAGAGCTT A>G |                   |
| TS1#23     | A1 : TCCAGTCACTTGTTCCGGCTCAACTTCAGTGGATGTGGGTTTTCGGAGAGCTT WT  | Het               |
|            | A2 : TCCAGTCACTTGTTCCGGCTCGACTTCAGTGGATGTGGGTTTTCGGAGAGCTT A>G |                   |

Bia, biallelic mutation; Het, heterozygous mutation; Hom, homozygous mutation.

**ABE8e-hAAG-TS2**

| ABE8e-hAAG | Ref : CTGATGATCCTTGCAAGGCCGAAGTCAGAGACCCTCGGCTCGAAGTTCTCATC    | Allelic variation |
|------------|----------------------------------------------------------------|-------------------|
| TS2#01     | A1 : CTGATGATCCTTGCAAGGCCGAAGTCAGAGACCCTCGGCTCGAAGTTCTCATC WT  | Het               |
|            | A2 : CTGATGATCCTTGCAAGGCCGGGTTCAGAGACCCTCGGCTCGAAGTTCTCATC A>G |                   |
| TS2#05     | A1 : CTGATGATCCTTGCAAGGCCGAAGTCAGAGACCCTCGGCTCGAAGTTCTCATC WT  | Het               |
|            | A2 : CTGATGATCCTTGCAAGGCCGGAGTCAGAGACCCTCGGCTCGAAGTTCTCATC A>G |                   |
| TS2#08     | A1 : CTGATGATCCTTGCAAGGCCGAAGTCAGAGACCCTCGGCTCGAAGTTCTCATC WT  | Het               |
|            | A2 : CTGATGATCCTTGCAAGGCCGGAGTCAGAGACCCTCGGCTCGAAGTTCTCATC A>G |                   |
| TS2#10     | A1 : CTGATGATCCTTGCAAGGCCGGAGTCAGAGACCCTCGGCTCGAAGTTCTCATC A>G | Bia               |
|            | A2 : CTGATGATCCTTGCAAGGCCGGGTTCAGAGACCCTCGGCTCGAAGTTCTCATC A>G |                   |
| TS2#13     | A1 : CTGATGATCCTTGCAAGGCCGGGTTCAGAGACCCTCGGCTCGAAGTTCTCATC A>G | Bia               |
|            | A2 : CTGATGATCCTTGCAAGGCCGGAGTCAGAGACCCTCGGCTCGAAGTTCTCATC A>G |                   |
| TS2#14     | A1 : CTGATGATCCTTGCAAGGCCGAAGTCAGAGACCCTCGGCTCGAAGTTCTCATC A>G | Bia               |
|            | A2 : CTGATGATCCTTGCAAGGCCGGGTTCAGAGACCCTCGGCTCGAAGTTCTCATC A>G |                   |
| TS2#16     | A1 : CTGATGATCCTTGCAAGGCCGAAGTCAGAGACCCTCGGCTCGAAGTTCTCATC WT  | Het               |
|            | A2 : CTGATGATCCTTGCAAGGCCGGAGTCAGAGACCCTCGGCTCGAAGTTCTCATC A>G |                   |
| TS2#18     | A1 : CTGATGATCCTTGCAAGGCCGAAGTCAGAGACCCTCGGCTCGAAGTTCTCATC WT  | Het               |
|            | A2 : CTGATGATCCTTGCAAGGCCGGAGTCAGAGACCCTCGGCTCGAAGTTCTCATC A>G |                   |
| TS2#19     | A1 : CTGATGATCCTTGCAAGGCCGGGTTCAGAGACCCTCGGCTCGAAGTTCTCATC A>G | Bia               |
|            | A2 : CTGATGATCCTTGCAAGGCCGGAGTCAGAGACCCTCGGCTCGAAGTTCTCATC A>G |                   |
| TS2#20     | A1 : CTGATGATCCTTGCAAGGCCGAAGTCAGAGACCCTCGGCTCGAAGTTCTCATC A>G | Bia               |
|            | A2 : CTGATGATCCTTGCAAGGCCGGGTTCAGAGACCCTCGGCTCGAAGTTCTCATC A>G |                   |

|        |                                                            |     |     |
|--------|------------------------------------------------------------|-----|-----|
| TS2#23 | A1: CTGATGATCCTTGCAAGGCCGAAGTCAGAGACCCCTCGGCTCGAAGTTCTCATC | WT  | Het |
|        | A2: CTGATGATCCTTGCAAGGCCGGAGTCAGAGACCCCTCGGCTCGAAGTTCTCATC | A>G |     |

#### ABE8e-hAAG-TS3

| ABE8e-hAAG | Ref : TCACCAAGAAAAGTAGCGAAAAAGCCGCTACAAACGGCACCGTCTAGAATCCT    | Allelic variation |
|------------|----------------------------------------------------------------|-------------------|
| TS3#1      | A1 : TCACCAAGAAAAGTAGCGAAAAAGCCGCTACAAACGGCACCGTCTAGAATCCT WT  | Het               |
|            | A2 : TCACCAAGAAAAGTAGCGGGGAAGCCGCTACAAACGGCACCGTCTAGAATCCT A>G |                   |
| TS3#10     | A1 : TCACCAAGAAAAGTAGCGAAAAAGCCGCTACAAACGGCACCGTCTAGAATCCT WT  | Het               |
|            | A2 : TCACCAAGAAAAGTAGCGAGGAGCCGCTACAAACGGCACCGTCTAGAATCCT A>G  |                   |
| TS3#13     | A1 : TCACCAAGAAAAGTAGCGAAAAAGCCGCTACAAACGGCACCGTCTAGAATCCT WT  | Het               |
|            | A2 : TCACCAAGAAAAGTAGCGAGGAAGCCGCTACAAACGGCACCGTCTAGAATCCT A>G |                   |
| TS3#14     | A1 : TCACCAAGAAAAGTAGCGAAGAAGCCGCTACAAACGGCACCGTCTAGAATCCT A>G | Bia               |
|            | A2 : TCACCAAGAAAAGTAGCGAGGAAGCCGCTACAAACGGCACCGTCTAGAATCCT A>G |                   |
| TS3#16     | A1 : TCACCAAGAAAAGTAGCGAAGAAGCCGCTACAAACGGCACCGTCTAGAATCCT A>G | Bia               |
|            | A2 : TCACCAAGAAAAGTAGCGAGGAAGCCGCTACAAACGGCACCGTCTAGAATCCT A>G |                   |
| TS3#18     | A1 : TCACCAAGAAAAGTAGCGAAAAAGCCGCTACAAACGGCACCGTCTAGAATCCT WT  | Het               |
|            | A2 : TCACCAAGAAAAGTAGCGAAGAAGCCGCTACAAACGGCACCGTCTAGAATCCT A>G |                   |
| TS3#19     | A1 : TCACCAAGAAAAGTAGCGAGGAAGCCGCTACAAACGGCACCGTCTAGAATCCT A>G | Bia               |
|            | A2 : TCACCAAGAAAAGTAGCGAAGAAGCCGCTACAAACGGCACCGTCTAGAATCCT A>G |                   |
| TS3#21     | A1 : TCACCAAGAAAAGTAGCGAGGGAGCCGCTACAAACGGCACCGTCTAGAATCCT A>G | Bia               |
|            | A2 : TCACCAAGAAAAGTAGCGGGGAGCCGCTACAAACGGCACCGTCTAGAATCCT A>G  |                   |
| TS3#23     | A1 : TCACCAAGAAAAGTAGCGAAAAAGCCGCTACAAACGGCACCGTCTAGAATCCT WT  | Het               |
|            | A2 : TCACCAAGAAAAGTAGCGAGGAAGCCGCTACAAACGGCACCGTCTAGAATCCT A>G |                   |

#### ABE8e-hAAG-TS4

| ABE8e-hAAG | Ref : ACGCATGGATAAACAAGAAGAAGACGATGAGCATTAGGGTTTCCTTAACCAGTT     | Allelic variation |
|------------|------------------------------------------------------------------|-------------------|
| TS4#01     | A1 : ACGCATGGATAAACAAGAAGGAGACGATGAGCATTAGGGTTTCCTTAACCAGTT A>G  | Hom               |
|            | A2 : ACGCATGGATAAACAAGAAGGAGACGATGAGCATTAGGGTTTCCTTAACCAGTT A>G  |                   |
| TS4#04     | A1 : ACGCATGGATAAACAAGAAGAAGACGATGAGCATTAGGGTTTCCTTAACCAGTT WT   | Het               |
|            | A2 : ACGCATGGATAAACAAGAAGGAGACGATGAGCATTAGGGTTTCCTTAACCAGTT A>G  |                   |
| TS4#05     | A1 : ACGCATGGATAAACAAGAAGGGGACGATGAGCATTAGGGTTTCCTTAACCAGTT A>G  | Bia               |
|            | A2 : ACGCATGGATAAACAAGAAGGAGACGATGAGCATTAGGGTTTCCTTAACCAGTT A>G  |                   |
| TS4#07     | A1 : ACGCATGGATAAACAAGAAGAAGACGATGAGCATTAGGGTTTCCTTAACCAGTT WT   | Het               |
|            | A2 : ACGCATGGATAAACAAGAAGGAGACGATGAGCATTAGGGTTTCCTTAACCAGTT A>G  |                   |
| TS4#08     | A1 : ACGCATGGATAAACAAGAAGGAAGACGATGAGCATTAGGGTTTCCTTAACCAGTT A>G | Bia               |
|            | A2 : ACGCATGGATAAACAAGAAGGAGACGATGAGCATTAGGGTTTCCTTAACCAGTT A>G  |                   |
| TS4#10     | A1 : ACGCATGGATAAACAAGAAGGAGACGATGAGCATTAGGGTTTCCTTAACCAGTT A>G  | Bia               |
|            | A2 : ACGCATGGATAAACAAGAAGGAAGACGATGAGCATTAGGGTTTCCTTAACCAGTT A>G |                   |
| TS4#11     | A1 : ACGCATGGATAAACAAGAAGGAGACGATGAGCATTAGGGTTTCCTTAACCAGTT A>G  | Bia               |
|            | A2 : ACGCATGGATAAACAAGAAGGGGACGATGAGCATTAGGGTTTCCTTAACCAGTT A>G  |                   |
| TS4#12     | A1 : ACGCATGGATAAACAAGAAGAAGACGATGAGCATTAGGGTTTCCTTAACCAGTT WT   | Het               |
|            | A2 : ACGCATGGATAAACAAGAAGGAGACGATGAGCATTAGGGTTTCCTTAACCAGTT A>G  |                   |
| TS4#13     | A1 : ACGCATGGATAAACAAGAAGGAGACGATGAGCATTAGGGTTTCCTTAACCAGTT A>G  | Bia               |

|        |                                                                                                                                         |     |
|--------|-----------------------------------------------------------------------------------------------------------------------------------------|-----|
|        | A2 : ACGCATGGATAAAACAAGAGGGGGACGATGAGCATTAGGGTTTCCTTAACCAGTT A>G                                                                        |     |
| TS4#14 | A1 : ACGCATGGATAAAACAAGGGGGAGACGATGAGCATTAGGGTTTCCTTAACCAGTT A>G<br>A2 : ACGCATGGATAAAACAAGGGGGAGACGATGAGCATTAGGGTTTCCTTAACCAGTT A>G    | Hom |
| TS4#15 | A1 : ACGCATGGATAAAACAAGAAGGGGACGATGAGCATTAGGGTTTCCTTAACCAGTT A>G<br>A2 : ACGCATGGATAAAACAAGAAGGGAGACGATGAGCATTAGGGTTTCCTTAACCAGTT A>G   | Bia |
| TS4#16 | A1 : ACGCATGGATAAAACAAGAGGGGGACGATGAGCATTAGGGTTTCCTTAACCAGTT A>G<br>A2 : ACGCATGGATAAAACAAGAAGGGAGACGATGAGCATTAGGGTTTCCTTAACCAGTT A>G   | Bia |
| TS4#17 | A1 : ACGCATGGATAAAACAAGAGGGAGACGATGAGCATTAGGGTTTCCTTAACCAGTT A>G<br>A2 : ACGCATGGATAAAACAAGAAGGGAGACGATGAGCATTAGGGTTTCCTTAACCAGTT A>G   | Bia |
| TS4#19 | A1 : ACGCATGGATAAAACAAGAGGGGGACGATGAGCATTAGGGTTTCCTTAACCAGTT A>G<br>A2 : ACGCATGGATAAAACAAGAAGGGAGACGATGAGCATTAGGGTTTCCTTAACCAGTT A>G   | Bia |
| TS4#20 | A1 : ACGCATGGATAAAACAAGAAGGGAGACGATGAGCATTAGGGTTTCCTTAACCAGTT A>G<br>A2 : ACGCATGGATAAAACAAGAGGAAGACGATGAGCATTAGGGTTTCCTTAACCAGTT A>G   | Bia |
| TS4#21 | A1 : ACGCATGGATAAAACAAGAGGGGGACGATGAGCATTAGGGTTTCCTTAACCAGTT A>G<br>A2 : ACGCATGGATAAAACAAGAAGGGAGACGATGAGCATTAGGGTTTCCTTAACCAGTT A>G   | Bia |
| TS4#22 | A1 : ACGCATGGATAAAACAAGAGGGAGACGATGAGCATTAGGGTTTCCTTAACCAGTT A>G<br>A2 : ACGCATGGATAAAACAAGGGGGGGACGATGAGCATTAGGGTTTCCTTAACCAGTT A>G    | Bia |
| TS4#23 | A1 : ACGCATGGATAAAACAAGGGGGAGACGATGAGCATTAGGGTTTCCTTAACCAGTT A>G<br>A2 : ACGCATGGATAAAACAAGAGGGGGACGATGAGCATTAGGGTTTCCTTAACCAGTT A>G    | Bia |
| TS4#02 | A1 : ACGCATGGATAA - - - - - AAGACGATGAGCATTAGGGTTTCCTTAACCAGTT -8bp<br>A2 : ACGCATGGATAAAACAAGAGGGAGACGATGAGCATTAGGGTTTCCTTAACCAGTT A>G | Bia |

#### ABE8e-hAAG-TS5

| ABE8e-hAAG | Ref : TAGATCCATCACATCTACTAAGACACGCGCCGCCATGATCGAGGTAATTAAGG                                                                      | Allelic variation |
|------------|----------------------------------------------------------------------------------------------------------------------------------|-------------------|
| TS5#01     | A1 : TAGATCCATCACATCTACTGAGACACGCGCCGCCATGATCGAGGTAATTAAGG A>G<br>A2 : TAGATCCATCACATCTACTGAGACACGCGCCGCCATGATCGAGGTAATTAAGG A>G | Hom               |
| TS5#05     | A1 : TAGATCCATCACATCTACTAAGACACGCGCCGCCATGATCGAGGTAATTAAGG WT<br>A2 : TAGATCCATCACATCTACTGAGACACGCGCCGCCATGATCGAGGTAATTAAGG A>G  | Het               |
| TS5#07     | A1 : TAGATCCATCACATCTACTAAGACACGCGCCGCCATGATCGAGGTAATTAAGG WT<br>A2 : TAGATCCATCACATCTACTGGGACACGCGCCGCCATGATCGAGGTAATTAAGG A>G  | Het               |
| TS5#08     | A1 : TAGATCCATCACATCTACTGGGACACGCGCCGCCATGATCGAGGTAATTAAGG A>G<br>A2 : TAGATCCATCACATCTACTGGGACACGCGCCGCCATGATCGAGGTAATTAAGG A>G | Hom               |
| TS5#10     | A1 : TAGATCCATCACATCTACTGAGACACGCGCCGCCATGATCGAGGTAATTAAGG A>G<br>A2 : TAGATCCATCACATCTACTGGGGACGCGCCGCCATGATCGAGGTAATTAAGG A>G  | Bia               |
| TS5#11     | A1 : TAGATCCATCACATCTACTAAGACACGCGCCGCCATGATCGAGGTAATTAAGG WT<br>A2 : TAGATCCATCACATCTACTGGGACACGCGCCGCCATGATCGAGGTAATTAAGG A>G  | Het               |
| TS5#13     | A1 : TAGATCCATCACATCTACTGGGGACGCGCCGCCATGATCGAGGTAATTAAGG A>G<br>A2 : TAGATCCATCACATCTACTGAGACACGCGCCGCCATGATCGAGGTAATTAAGG A>G  | Bia               |
| TS5#14     | A1 : TAGATCCATCACATCTACTGAGACACGCGCCGCCATGATCGAGGTAATTAAGG A>G<br>A2 : TAGATCCATCACATCTACTGGGACACGCGCCGCCATGATCGAGGTAATTAAGG A>G | Bia               |
| TS5#15     | A1 : TAGATCCATCACATCTACTGGGACACGCGCCGCCATGATCGAGGTAATTAAGG A>G<br>A2 : TAGATCCATCACATCTACTGAGACACGCGCCGCCATGATCGAGGTAATTAAGG A>G | Bia               |
| TS5#16     | A1 : TAGATCCATCACATCTACTGAGACACGCGCCGCCATGATCGAGGTAATTAAGG A>G                                                                   | Bia               |

|        |                      |                         |                     |     |
|--------|----------------------|-------------------------|---------------------|-----|
|        | A2 : TAGATCCATCACATC | TACTGAGGCACGCGCCGCCATGA | TCGAGGTAATTAAGG A>G |     |
| TS5#17 | A1 : TAGATCCATCACATC | TACTAAGACACGCGCCGCCATGA | TCGAGGTAATTAAGG WT  | Het |
|        | A2 : TAGATCCATCACATC | TACTGAGACACGCGCCGCCATGA | TCGAGGTAATTAAGG A>G |     |
| TS5#18 | A1 : TAGATCCATCACATC | TACTGAGACACGCGCCGCCATGA | TCGAGGTAATTAAGG A>G | Bia |
|        | A2 : TAGATCCATCACATC | TACTAGGGCACGCGCCGCCATGA | TCGAGGTAATTAAGG A>G |     |
| TS5#19 | A1 : TAGATCCATCACATC | TACTGAGACACGCGCCGCCATGA | TCGAGGTAATTAAGG A>G | Hom |
|        | A2 : TAGATCCATCACATC | TACTGAGACACGCGCCGCCATGA | TCGAGGTAATTAAGG A>G |     |
| TS5#20 | A1 : TAGATCCATCACATC | TACTGAGACACGCGCCGCCATGA | TCGAGGTAATTAAGG A>G | Bia |
|        | A2 : TAGATCCATCACATC | TACTGGGACACGCGCCGCCATGA | TCGAGGTAATTAAGG A>G |     |
| TS5#21 | A1 : TAGATCCATCACATC | TACTAAGACACGCGCCGCCATGA | TCGAGGTAATTAAGG WT  | Het |
|        | A2 : TAGATCCATCACATC | TACTAGGACACGCGCCGCCATGA | TCGAGGTAATTAAGG A>G |     |
| TS5#22 | A1 : TAGATCCATCACATC | TACTAGGACACGCGCCGCCATGA | TCGAGGTAATTAAGG A>G | Bia |
|        | A2 : TAGATCCATCACATC | TACTAAGGCACGCGCCGCCATGA | TCGAGGTAATTAAGG A>G |     |
| TS5#23 | A1 : TAGATCCATCACATC | TACTGAGACACGCGCCGCCATGA | TCGAGGTAATTAAGG A>G | Bia |
|        | A2 : TAGATCCATCACATC | TACTGAGGCACGCGCCGCCATGA | TCGAGGTAATTAAGG A>G |     |

**Sequence S1.** The sequence of rUNG and hUNG.

>rUNG

ATGGCTCCACCACTTCCACCAACAGCTCCAAAGACGATCGCCGACTACCTCATCAGGCCGTCCAAGAGGCT  
TAGGCCAACATCTCCAGCTCCAGCCGCTGCTGCCTCTGCTCCACTCTTCTAGTTGCTCTCCCCGGAACA  
AAGGCGCAGGGCCGATACAAATCTCGCCCTCGCCAGAGCTAGACGCCATCTCAGACTTGCCGAGTCTAAG  
GCTTCTGGCGGCACAGCCAAGCTCGAGGAACTCCTCGTTGAGGAAACCTGGCTCGAAGCGTTGCCAGGC  
GAGCTGCATAAGCCATACGCTCTCGAGCTTTGCCGCTTCGTGGCCCATGAGAGGCTTCATTCTCCGGTGCC  
AGTGTACCCACCACCGCACCTCGTTTTTCATGCGCTCCATGCCACACCGTTCGATCGCGTGAAGGCCGTGA  
TCATCGGACAGGACCCATATCATGGCCAGGCCAAGCTATGGGCCTCAGCTTTTCTGTGCCAGAGGGCAT  
CAAGATCCCGTCCAGCCTCGCGAACATCTTCAAAGAGCTTCAGAAGGACCTCGGCTGCACCGTGCCATCTC  
ATGGCAATCTTGAGAGGTGGGCCGTGCAGGGCGTGCTCATGCTCAATACTGTGCTCACCGTGCGCGAGC  
ACCAGGCCAATAGCCATGCTAAGAAAGGCTGGGAGCAGTTCACCGACGCCGTCAAGACCATCAGCCT  
CAAGAAGTCCGGCATCGTTTTTCATCCTCTGGGGCAACAGCGCCCAGGCTAAGACCAGGCTCATCGACGAG  
ACAAAGCACCATCCTCAAGAGCGCCATCCATCTGGCCTTTCTGCTTCCAGAGGCTTCTTCGGCTGCCG  
CCACTTCTCCAAGACCAACCAGATTCTCGAGCGCCTCGGCCTCTCTGCCATTGATTGGCAGCTC

>hUNG

ATGTTTGGCGAGTCCTGGAAGAAGCACCTCTCCGGCGAATTCGGCAAGCCGTACTTCATCAAGCTCATGGG  
CTTCGTGGCCGAGGAACGCAAGCACTACACAGTGTACCCACCGCCGCACCAGGTGTTACCTGGACACAGA  
TGTGCGACATCAAGGACGTGAAGGTGGTGATCCTCGGACAGGACCCATACCACGGACCAAATCAAGCCCAC  
GGCCTCTGCTTCTCTGTGCAGAGGCCAGTTCACCAACCACCGAGCCTCGAGAACATCTACAAAGAGCTGTC  
CACCGACATCGAGGACTTCGTGCATCCAGGCCATGGCGATCTTTCTGGCTGGGCCAAACAAGGCGTGCTCC  
TCCTCAATGCCGTGCTCACAGTTAGGGCCCATCAGGCCAACAGCCACAAAGAAAGAGGCTGGGAGCAGTT  
CACCGACGCCGTTGTGTCTTGGCTCAACCAGAACTCCAACGGCCTCGTGTCTTGCTCTGGGGCTCTTACGC  
CCAGAAGAAGGGCTCTGCCATCGACCGCAAGAGGCACCATGTGCTCCAAACAGCTCATCCGTCACCGCTCT  
CAGTGACAGGGGCTTCTTCGGCTGTGCCACTTCTCCAAGACCAACGAGCTGCTCCAGAAGTCCGGCAAG  
AAGCCGATCGACTGGAAAGAGCTT

**Sequence S2.** The sequence of hAAG and EndoV.

**>hAAG**

ATGAAGGGCCATCTCACAAGGCTCGGCCTCGAGTTCTTCGATCAACCAGCTGTTTCCTCTCGCCAGGGCCTTCCTCGGCC  
AAGTGCTCGTTAGAAGGCTCCCGAATGGCACCGAACTCCGCGGCAGAATCGTTGAGACAGAGGCCTATCTCGGCCCAGA  
GGATGAGGCCGCTCATTCTAGAGGCGGCAGACAGACACCTCGCAACCGCGGCATGTTTATGAAGCCGGGCACGCTCTAC  
GTGTACATTATCTACGGCATGTATTTCTGCATGAACATCTCCAGCCAAGGCGACGGCGCTTGCGTTCTCCTTAGAGCCC  
TTGAGCCACTCGAGGGCCTCGAAACCATGAGGCATGTGAGGTCCCAGCTGAGGAAGGGCACAGCTTCTAGGGTGCTCAA  
GGATCGCGAGTTGTGCAGCGGACCGTCCAAGCTCTGTCAAGCCCTCGCCATCAACAAGTCCTTCGACCAGAGAGATCTC  
GCCCAGGACGAGGCTGTTTGGCTTGAAAGAGGCCCCACTCGAGCCATCTGAGCCAGCCGTTGTTGCTGCTGCTAGAGTTG  
GCGTTGGCCATGCTGGCGAATGGGCTAGAAAGCCGCTCCGCTTCTATGTGAGAGGCTCCCCATGGGTGTCAGTGGTGGA  
TAGAGTGGCCGAGCAAGA

**> EndoV**

ATGGATCTCGCTTCTCTCAGGGCCCAGCAGATCGAGCTTGCCCTTCTGTGATCCGCGAGGACAGGCTCGATAAGGACC  
CGCCGGATCTTATTGCCGGCGCTGATGTTGGCTTTGAGCAAGGCGGCGAGGTTACAAGAGCCGCCATGGTGCTCCTCAA  
GTACCCATCTCTCGAGCTGGTCGAGTACAAGGTGGCCAGGATCGCCACCACCATGCCGTATATTCAGGCTTCCTCAGC  
TTCCGCGAGTACCCTGCACTTCTCGCTGCTTGGGAGATGCTCAGCCAAAAGCCGGACCTCGTGTTCTGTTGATGGCCACG  
GCATTTCTCATCCAAGAAGGCTCGGCGTCGCCAGCCATTTCCGGCCTTCTCGTGATGTTCCAACCATCGGCGTGGCCAA  
GAAGAGGCTCTGCGGCAAGTTTGAGCCACTCTCTTCAGAGCCAGGCGCTCTCGCTCCGCTTATGGATAAGGGCGAGCAA  
CTCGCCTGGGTGTGGCGTTCTAAGGCCAGGTGCAACCCGCTCTTTATCGCCACAGGCCATAGGGTGTCAGTGGATTCTG  
CCCTCGCTTGGGTGCAGAGATGCATGAAGGGCTACAGACTCCCAGAGCCAACCATGGGCCGATGCTGTTGCTTCTGA  
GAGGCCAGCCTTCGTGAGGTACACCGCCAATCAGCCA
